# Supplementary material for: Estimation of reference evapotranspiration using some class-A pan evaporimeter pan coefficient estimation models in Mediterranean–Southeastern Anatolian transitional zone conditions of Turkey
Source: PeerJ. 2024 Jul 12;12:e17685. doi: 10.7717/peerj.17685 (PMC11249018; doi:10.7717/peerj.17685)
Supplement: Supplemental Information 1 [file peerj-12-17685-s001.xlsx]

## Sheet: Sayfa1
Date	Maximum air temperature_Tmax (oC)	Minimum air temperature_Tmin (oC)	daily average air temperature_T (oC)	Solar_radiation_RS (MJ m-2 day-1)	Date	Maximum relative humidity_RHmax (%)	Minimum relative humidity_RHmin (%)	daily average relative humidity_RH (%)	wind velocity_U2 (m s-1)	Pan evaporation_Epan (mm day-1)	Reference evaporation_ETo (mm day-1)	Pan coefficient_ Kp
2020-07-01	33.7	19.7	26.7	30.2256	2020-07-01	65	24.1	44.55	3.54	13	7.75	0.596154
2020-07-02	34.3	18.3	26.3	27.9342	2020-07-02	72.6	25.9	49.25	1.95	13	6.99	0.537692
2020-07-03	35.9	20.3	28.1	28.8936	2020-07-03	61	18	39.5	1.59	12	6.87	0.5725
2020-07-04	35.2	18	26.6	27.7452	2020-07-04	55.8	17.1	36.45	1.11	11	6.33	0.575455
2020-07-05	36.6	23	29.8	29.1618	2020-07-05	67.5	18.1	42.8	2.25	13	8.12	0.624615
2020-07-06	35.4	22.7	29.05	28.197	2020-07-06	69	24.4	46.7	2.27	13	7.95	0.611538
2020-07-07	29.6	22.8	26.2	28.2096	2020-07-07	74.1	48.5	61.3	2.52	9	7.89	0.876667
2020-07-08	30.6	22.1	26.35	28.359	2020-07-08	69.2	40.2	54.7	3.54	12	6.97	0.580833
2020-07-09	34.9	20.1	27.5	28.3194	2020-07-09	69.1	22.6	45.85	3.54	12	7.36	0.613333
2020-07-10	35	20.2	27.6	27.9054	2020-07-10	74.1	20.3	47.2	2.65	12	7.81	0.650833
2020-07-11	33.4	21.5	27.45	27.8928	2020-07-11	70.2	32.4	51.3	2.63	11	7.99	0.726364
2020-07-12	31.6	21.2	26.4	28.4418	2020-07-12	75.5	38.6	57.05	3.44	10	7.91	0.791
2020-07-13	32.8	21.5	27.15	29.1636	2020-07-13	68.6	22.5	45.55	3.58	14	7.71	0.550714
2020-07-14	34.8	21.2	28	29.2266	2020-07-14	64.6	19.2	41.9	3.15	12	8.36	0.696667
2020-07-15	36.9	22.2	29.55	29.034	2020-07-15	68.5	13.7	41.1	2.75	16	8.2	0.5125
2020-07-16	32.8	22	27.4	28.6272	2020-07-16	74.6	31.2	52.9	2.61	10	8.34	0.834
2020-07-17	30.1	22.7	26.4	27.8658	2020-07-17	71	46.3	58.65	3.04	10	7.62	0.762
2020-07-18	31.5	21.5	26.5	27.9846	2020-07-18	75.8	42.3	59.05	3.69	11	7.03	0.639091
2020-07-19	36.8	21.4	29.1	28.0314	2020-07-19	79	20.5	49.75	3.06	13	6.88	0.529231
2020-07-20	35.8	19.1	27.45	28.242	2020-07-20	86.4	17.8	52.1	1.79	11	7.15	0.65
2020-07-21	32.9	22.9	27.9	29.151	2020-07-21	69.1	40.5	54.8	3.44	15	8.9	0.593333
2020-07-22	36.2	22.4	29.3	27.6966	2020-07-22	64.4	17.1	40.75	3.2	16	8.93	0.558125
2020-07-23	37.5	20.4	28.95	29.0412	2020-07-23	65.3	17.5	41.4	2.9	15	8.6	0.573333
2020-07-24	36.3	23.2	29.75	27.6516	2020-07-24	66.7	20.6	43.65	2.15	13	7.84	0.603077
2020-07-25	31.9	23.7	27.8	27.0792	2020-07-25	69.4	44	56.7	2.88	13	8.25	0.634615
2020-07-26	35.5	23.3	29.4	26.5824	2020-07-26	71.5	26	48.75	3.63	14	7.13	0.509286
2020-07-27	38.3	20.8	29.55	26.6814	2020-07-27	77.3	16.6	46.95	1.68	11	6.69	0.608182
2020-07-28	35.1	23.3	29.2	25.0452	2020-07-28	63.6	22.4	43	1.38	12	6.54	0.545
2020-07-29	36.6	22.7	29.65	26	2020-07-29	68.9	21	44.95	1.68	10	5.62	0.562
2020-07-30	36.3	23.9	30.1	27.0108	2020-07-30	63.2	18.8	41	2.67	14	8.08	0.577143
2020-07-31	34.1	22.9	28.5	27.8658	2020-07-31	65.3	20.2	42.75	2.94	13	8.45	0.65
2020-08-01	33.7	22.5	28.1	27.981	2020-08-01	64.7	17.9	41.3	3.17	12	8.22	0.685
2020-08-02	34.3	23.2	28.75	27.54	2020-08-02	65.5	20.8	43.15	3.11	14	8.21	0.586429
2020-08-03	34.1	21.6	27.85	26.3448	2020-08-03	69.6	13	41.3	2.94	11	7.9	0.718182
2020-08-04	32.1	21.4	26.75	27.6714	2020-08-04	65.3	30.7	48	2.75	15	7.94	0.529333
2020-08-05	32.5	21.9	27.2	27.09	2020-08-05	67.4	37.6	52.5	3.61	12	7.74	0.645
2020-08-06	34.3	21.9	28.1	26.5122	2020-08-06	70.9	29.7	50.3	3.92	12	7.71	0.6425
2020-08-07	36.5	21.8	29.15	27.3186	2020-08-07	68.6	17.4	43	3.65	14	8.08	0.577143
2020-08-08	32.6	20.8	26.7	27.333	2020-08-08	72.8	32.1	52.45	3.15	11	8.35	0.759091
2020-08-09	29.3	22.5	25.9	26.8578	2020-08-09	71.6	45.5	58.55	3.33	12	7.52	0.626667
2020-08-10	28.6	22.5	25.55	26.3988	2020-08-10	71.4	49	60.2	3.83	11	6.76	0.614545
2020-08-11	30.8	22	26.4	25.5672	2020-08-11	68.7	42	55.35	4.23	11	6.73	0.611818
2020-08-12	33.5	20.6	27.05	25.3728	2020-08-12	66	21.3	43.65	3.27	11	6.99	0.635455
2020-08-13	35.4	21.2	28.3	26.5554	2020-08-13	67.8	14.2	41	3.73	13	8.21	0.631538
2020-08-14	34.3	22.1	28.2	26.5248	2020-08-14	37.5	19.3	28.4	2.88	14	8.25	0.589286
2020-08-15	33.9	23	28.45	26.5176	2020-08-15	45.9	14	29.95	3.02	15	8.32	0.554667
2020-08-16	32.7	20.3	26.5	26.9766	2020-08-16	51.7	14.6	33.15	2.58	15	7.77	0.518
2020-08-17	33	20.2	26.6	26.6004	2020-08-17	57.9	15.8	36.85	3.35	14	8.24	0.588571
2020-08-18	32.9	20.5	26.7	26.46	2020-08-18	62.4	21.2	41.8	3.25	13	8.04	0.618462
2020-08-19	32.9	21.1	27	26.0082	2020-08-19	66.5	27.1	46.8	3.52	12	7.75	0.645833
2020-08-20	32.1	21.1	26.6	25.8858	2020-08-20	74.9	34.5	54.7	3.94	11	7.73	0.702727
2020-08-21	30.5	22.7	26.6	24.9354	2020-08-21	70	43.3	56.65	3.56	12	7.06	0.588333
2020-08-22	31.3	22.3	26.8	22.4946	2020-08-22	41.1	26.8	33.95	3.92	13	6.95	0.534615
2020-08-23	32.7	21.5	27.1	25.2558	2020-08-23	38.5	19.8	29.15	3.15	15	7.53	0.502
2020-08-24	33.7	19	26.35	25.0182	2020-08-24	42.7	11	26.85	2.23	13	6.75	0.519231
2020-08-25	34.6	16	25.3	24.9426	2020-08-25	58.1	12.9	35.5	1.47	10	5.89	0.589
2020-08-26	34.6	20.6	27.6	24.1884	2020-08-26	62.4	15	38.7	2.05	11	6.7	0.609091
2020-08-27	34	21	27.5	23.5656	2020-08-27	72.6	27.9	50.25	2.63	10	7.09	0.709
2020-08-28	37.3	22	29.65	22.3182	2020-08-28	72.9	15.3	44.1	2.56	11	6.47	0.588182
2020-08-29	38.5	19.5	29	22.5234	2020-08-29	69.8	12.6	41.2	1.63	11	6.07	0.551818
2020-08-30	38.5	17.4	27.95	23.2416	2020-08-30	50.6	6.45	28.525	1.06	10	5.41	0.541
2020-08-31	39.2	18.1	28.65	23.9994	2020-08-31	62.2	9.48	35.84	1.05	11	5.49	0.499091
2020-09-01	37.6	20.1	28.85	22.9842	2020-09-01	59.2	16.7	37.95	1.58	10	6.39	0.639
2020-09-02	36.2	21.4	28.8	20.5236	2020-09-02	57	17.2	37.1	1.37	9	5.55	0.616667
2020-09-03	38.8	19.1	28.95	20.88	2020-09-03	53.2	14.6	33.9	0.98	9	3.74	0.415556
2020-09-04	38.7	19.9	29.3	21.6828	2020-09-04	49.6	11.1	30.35	0.94	9	5.04	0.56
2020-09-05	36.6	20.4	28.5	21.438	2020-09-05	47.1	17.5	32.3	1.61	11	6.26	0.569091
2020-09-06	35.4	19.3	27.35	22.1274	2020-09-06	58	19.1	38.55	2	11	6.42	0.583636
2020-09-07	36	20.5	28.25	22.1904	2020-09-07	62.7	24.3	43.5	2	9	6.19	0.687778
2020-09-08	36	20.1	28.05	21.8682	2020-09-08	67	16.7	41.85	1.84	9	5.9	0.655556
2020-09-09	34.9	24.4	29.65	22.5018	2020-09-09	33.9	15.1	24.5	2.4	14	7.05	0.503571
2020-09-10	35.4	19.5	27.45	22.9122	2020-09-10	46.8	14.4	30.6	1.78	14	5.99	0.427857
2020-09-11	35.9	16.4	26.15	21.4182	2020-09-11	56	14.4	35.2	0.83	6	4.46	0.743333
2020-09-12	36.4	19.9	28.15	16.866	2020-09-12	68.6	15.3	41.95	0.98	8	4.32	0.54
2020-09-13	33.1	20.8	26.95	18.6822	2020-09-13	26.6	30.5	28.55	1.79	9	5.63	0.625556
2020-09-14	33.2	21.1	27.15	20.2608	2020-09-14	73.4	24.6	49	2.65	9	5.9	0.655556
2020-09-15	34.9	18.1	26.5	20.9988	2020-09-15	78.4	20.5	49.45	1.36	7	4.78	0.682857
2020-09-16	36.1	17.9	27	20.7972	2020-09-16	74.6	15.1	44.85	1.26	10	4.86	0.486
2020-09-17	33	22.7	27.85	20.7936	2020-09-17	69.5	33.2	51.35	1.56	9	5.48	0.608889
2020-09-18	32.9	21.4	27.15	20.0196	2020-09-18	75.4	29.3	52.35	2.58	8	5.76	0.72
2020-09-19	33.2	22.4	27.8	20.1492	2020-09-19	70.5	23.2	46.85	2.67	8	5.97	0.74625
2020-09-20	30.4	20.9	25.65	19.5606	2020-09-20	68.1	32.1	50.1	2.25	10	5.69	0.569
2020-09-21	30.6	16.3	23.45	15.0822	2020-09-21	76.6	24	50.3	1.92	7	4.27	0.61
2020-09-22	31	19.9	25.45	19.6902	2020-09-22	68.9	31.4	50.15	1.11	8	5.08	0.635
2020-09-23	30.2	20.3	25.25	19.6452	2020-09-23	71.1	33.9	52.5	2.69	9	5.46	0.606667
2020-09-24	30.3	20.4	25.35	18.6876	2020-09-24	73.9	33.2	53.55	2.83	8	5.41	0.67625
2020-09-25	28.4	20.3	24.35	19.197	2020-09-25	74.6	41.4	58	2.75	9	5.3	0.588889
2020-09-26	28.6	18.4	23.5	15.2028	2020-09-26	69.1	37.5	53.3	2.6	7	4.44	0.634286
2020-09-27	31	20.7	25.85	19.1016	2020-09-27	67.8	33.9	50.85	2.75	8	5.07	0.63375
2020-09-28	34.3	19.8	27.05	18.5922	2020-09-28	71.7	22.9	47.3	2.52	10	5.12	0.512
2020-09-29	34.3	19.1	26.7	18.009	2020-09-29	66.7	19.4	43.05	1.45	8	4.53	0.56625
2020-09-30	29.2	19.6	24.4	18.648	2020-09-30	61.9	31.9	46.9	2.5	9	5.97	0.663333
2020-10-01	26.7	15.9	21.3	14.238	2020-10-01	79	38.7	58.85	1.99	7	3.95	0.564286
2020-10-02	27	13.7	20.35	17.712	2020-10-02	81.9	33.3	57.6	1.72	6	3.68	0.613333
2020-10-03	29.6	16.6	23.1	18.7578	2020-10-03	68.3	19.4	43.85	2.21	8	4.33	0.54125
2020-10-04	29	16.3	22.65	18.342	2020-10-04	58.9	15.7	37.3	2.03	6	4.76	0.793333
2020-10-05	31	16.9	23.95	18.6732	2020-10-05	52.2	11.9	32.05	1.89	9	4.68	0.52
2020-10-06	31.4	13.3	22.35	18.6012	2020-10-06	48.1	15	31.55	1.13	7	3.8	0.542857
2020-10-07	31.8	14.1	22.95	17.7066	2020-10-07	50.7	20.2	35.45	1.16	8	3.81	0.47625
2020-10-08	29.2	10.9	20.05	17.1342	2020-10-08	61.9	13.6	37.75	1.16	5	3.7	0.74
2020-10-09	28.5	11.5	20	17.2062	2020-10-09	52.4	19.3	35.85	0.9	7	3.21	0.458571
2020-10-10	28.2	12.2	20.2	17.1072	2020-10-10	52.1	20.2	36.15	1.65	8	3.99	0.49875
2020-10-11	29.6	11	20.3	15.5142	2020-10-11	61.9	18.8	40.35	1.69	7	3.88	0.554286
2020-10-12	30.3	11.2	20.75	16.4664	2020-10-12	71.3	16.7	44	0.75	4	2.91	0.7275
2020-10-13	30.2	11.8	21	16.587	2020-10-13	67	18.8	42.9	0.72	4	2.86	0.715
2020-10-14	30.5	15	22.75	15.0264	2020-10-14	78	21.5	49.75	1.39	5	3.58	0.716
2020-10-15	28.5	16.9	22.7	16.1928	2020-10-15	69.8	33.9	51.85	2.07	7	4.37	0.624286
2020-10-16	29.8	16.9	23.35	15.849	2020-10-16	72.2	31.2	51.7	2.38	7	4.15	0.592857
2020-10-17	29.1	14.6	21.85	15.51	2020-10-17	77.4	24.2	50.8	1.58	5	3.56	0.712
2020-10-18	28.1	12.4	20.25	15.26	2020-10-18	78.5	20.9	49.7	1.22	6	3.18	0.53
2020-10-19	27.5	13.4	20.45	15.35	2020-10-19	80	32.3	56.15	0.96	4	2.85	0.7125
2020-10-20	26.9	13	19.95	14.74	2020-10-20	83.4	28.7	56.05	1.61	6	3.27	0.545
2020-10-21	28.6	12.3	20.45	15.17	2020-10-21	73.8	25.3	49.55	0.4	5	2.67	0.534
2020-10-22	29	11.7	20.35	14.6	2020-10-22	72.1	24.4	48.25	0.62	5	2.34	0.468
2020-10-23	29	11	20	14.66	2020-10-23	82.4	21.5	51.95	0.93	5	2.74	0.548
2020-10-24	30.2	9.29	19.745	14.05	2020-10-24	65.9	15.6	40.75	0.65	5	2.3	0.46
2020-10-25	28.4	11.7	20.05	14.6	2020-10-25	54.1	15.8	34.95	0.61	5	2.3	0.46
2020-10-26	27.5	9.29	18.395	14.42	2020-10-26	62.3	19.3	40.8	0.68	4	2.3	0.575
2020-10-27	28	9.75	18.875	13.94	2020-10-27	61.4	17.7	39.55	0.72	5	2.3	0.46
2020-10-28	26	13.5	19.75	13.23	2020-10-28	50	19.5	34.75	1.17	4	2.81	0.7025
2020-10-29	27.3	11	19.15	10.51	2020-10-29	65.6	24.5	45.05	1.34	6	2.3	0.383333
2020-10-30	25.9	9.42	17.66	13.26	2020-10-30	78.5	20	49.25	0.84	4	2.44	0.61
2020-10-31	24.5	14	19.25	12.59	2020-10-31	56.5	32.4	44.45	0.98	3	2.2	0.733333
												0.604323
