# Supplementary material for: Estimation of reference evapotranspiration using some class-A pan evaporimeter pan coefficient estimation models in Mediterranean–Southeastern Anatolian transitional zone conditions of Turkey
Source: PeerJ. 2024 Jul 12;12:e17685. doi: 10.7717/peerj.17685 (PMC11249018; doi:10.7717/peerj.17685)
Supplement: Supplemental Information 2 [file peerj-12-17685-s002.xlsx]

## Sheet: Sayfa1
Date	Tmax (oC)	Tmin (oC)	T (oC)	RS (MJ m-2 day-1)	Date	RHmax (%)	RHmin (%)	RH (%)	U2 (m s-1)	Epan (mm day-1)	ETo (mm day-1)	Kp
2021-07-01	38.6	24.7	31.65	27.2523	2021-07-01	48.8	27.6	38.2	1.85	13	7.64784	0.588296
2021-07-02	36.1	23.5	29.8	28.5205	2021-07-02	69.6	29.1	49.35	3.25	15	8.64362	0.576242
2021-07-03	32.5	23.2	27.85	29.0741	2021-07-03	77.9	51.4	64.65	3.63	11	8.04324	0.731204
2021-07-04	31.4	23.1	27.25	29.0618	2021-07-04	82.6	36.9	59.75	3.48	11	7.75486	0.704987
2021-07-05	32.8	17.7	25.25	29.1161	2021-07-05	78.5	45.9	62.2	2.73	11	7.58206	0.689278
2021-07-06	31.9	21.8	26.85	28.5081	2021-07-06	74.6	42	58.3	2.63	12	7.29709	0.608091
2021-07-07	35.2	20.6	27.9	29.1264	2021-07-07	75	39.4	57.2	3.54	12	8.86742	0.738951
2021-07-08	37.8	22.8	30.3	27.8122	2021-07-08	76.4	53.5	64.95	2.52	12	8.38804	0.699003
2021-07-09	38.3	24.4	31.35	27.2865	2021-07-09	79.6	31.3	55.45	2.52	11	8.20307	0.745734
2021-07-10	35.5	23.5	29.5	28.9053	2021-07-10	77.9	31.5	54.7	3.88	10	9.19919	0.919919
2021-07-11	34.7	23.7	29.2	27.8373	2021-07-11	82.2	46.2	64.2	2.71	12	7.78081	0.6484
2021-07-12	36	23.9	29.95	28.4187	2021-07-12	78	43.9	60.95	3.75	15	8.92927	0.595285
2021-07-13	38.6	24.5	31.55	27.7654	2021-07-13	79.2	48.5	63.85	3.06	13	9.20621	0.70817
2021-07-14	37.7	23.5	30.6	27.2556	2021-07-14	82.7	44.4	63.55	2.17	13	7.91222	0.608632
2021-07-15	36	24.7	30.35	28.2346	2021-07-15	78.8	51.8	65.3	3.21	14	8.967	0.6405
2021-07-16	38.7	24	31.35	27.0955	2021-07-16	83	49.2	66.1	2.4	15	8.28635	0.552423
2021-07-17	40.2	24.8	32.5	26.4707	2021-07-17	81.4	40.7	61.05	2.31	13	8.20377	0.631059
2021-07-18	38.9	24.5	31.7	26.6633	2021-07-18	75.3	56.8	66.05	2.29	12	8.06493	0.672078
2021-07-19	38.6	25	31.8	26.4599	2021-07-19	77.5	54.7	66.1	2.08	12	7.77404	0.647837
2021-07-20	34.7	23.9	29.3	27.7397	2021-07-20	78.3	50	64.15	2.98	12	8.28457	0.690381
2021-07-21	32.7	24	28.35	28.5213	2021-07-21	78	49.6	63.8	4.27	15	8.40166	0.560111
2021-07-22	33.9	24.3	29.1	28.3991	2021-07-22	76.1	41.1	58.6	4.65	13	8.53444	0.656495
2021-07-23	36.5	24.3	30.4	27.3941	2021-07-23	76.2	45.2	60.7	3.15	11	8.72943	0.793584
2021-07-24	34.6	22.3	28.45	27.5247	2021-07-24	78.4	57.3	67.85	2.77	13	7.98186	0.613989
2021-07-25	36.4	22.7	29.55	26.7284	2021-07-25	78.3	49.1	63.7	2.33	13	7.68491	0.591147
2021-07-26	36.1	22.4	29.25	25.9976	2021-07-26	77.5	27.6	52.55	1.81	11	6.80682	0.618802
2021-07-27	35.9	23.7	29.8	26.6188	2021-07-27	75.6	23.4	49.5	2.44	10	7.73662	0.773662
2021-07-28	35.3	26.2	30.75	27.2805	2021-07-28	75.8	40.3	58.05	3	11	8.74878	0.795343
2021-07-29	38.8	23.1	30.95	27.0527	2021-07-29	82.3	39.4	60.85	2.96	13	9.05047	0.69619
2021-07-30	38.2	25.8	32	26.1423	2021-07-30	81.5	46.1	63.8	2.65	15	8.39305	0.559537
2021-07-31	38.2	24.6	31.4	26.7822	2021-07-31	81.3	53.4	67.35	3.29	12	9.32933	0.777444
2021-08-01	39.6	24.7	32.15	26.5828	2021-08-01	81.4	49.7	65.55	3.46	15	9.6009	0.64006
2021-08-02	40.1	25	32.55	25.7406	2021-08-02	78.9	59.7	69.3	2.54	15	8.50698	0.567132
2021-08-03	40.3	27.1	33.7	25.2459	2021-08-03	77.4	52.4	64.9	2.46	14	8.3645	0.597464
2021-08-04	41.2	26.6	33.9	25.1543	2021-08-04	78.6	56.1	67.35	2.42	12	8.4502	0.704184
2021-08-05	41.7	25.4	33.55	25.3111	2021-08-05	79.9	46.2	63.05	2.77	13	8.97283	0.690218
2021-08-06	38.9	23.6	31.25	24.9273	2021-08-06	75.4	33.7	54.55	1.96	9	7.30071	0.81119
2021-08-07	35.1	19.7	27.4	25.6272	2021-08-07	73.6	21.9	47.75	2.04	8	6.72523	0.840654
2021-08-08	32.6	23.7	28.15	24.8631	2021-08-08	68.1	24.1	46.1	1.58	10	6.01313	0.601313
2021-08-09	33.8	22.5	28.15	25.5313	2021-08-09	75.2	41.9	58.55	2.4	8	6.94959	0.868699
2021-08-10	34.1	22.3	28.2	22.2	2021-08-10	77.8	47.5	62.65	2.56	11	6.77449	0.615863
2021-08-11	34.9	22.8	28.85	25.3667	2021-08-11	73.6	25.9	49.75	2.4	10	7.23362	0.723362
2021-08-12	34.7	20.1	27.4	24.9313	2021-08-12	77.8	28.2	53	1.6	13	6.22044	0.478495
2021-08-13	35.3	21	28.15	24.3347	2021-08-13	80.8	36.9	58.85	1.91	13	6.32798	0.486768
2021-08-14	33.9	20.8	27.35	24.6866	2021-08-14	80.4	38.9	59.65	1.91	12	6.30615	0.525512
2021-08-15	34.3	24.3	29.3	24.6656	2021-08-15	81.9	64	72.95	2.38	12	7.01132	0.584277
2021-08-16	34.4	22.5	28.45	21.4	2021-08-16	79.8	57.5	68.65	3.04	13	7.33269	0.564053
2021-08-17	34.4	22.3	28.35	24.6643	2021-08-17	78.3	55.8	67.05	2.54	14	7.01442	0.50103
2021-08-18	35	22.5	28.75	24.8769	2021-08-18	78.6	49.6	64.1	3.33	9	7.69422	0.854914
2021-08-19	34.4	23.6	29	24.2863	2021-08-19	80.3	43.2	61.75	2.88	13	7.09364	0.545665
2021-08-20	37.6	22.1	29.85	24.4596	2021-08-20	83.8	44.1	63.95	3.13	14	8.33884	0.595632
2021-08-21	38.3	22.7	30.5	23.6287	2021-08-21	78.2	51.1	64.65	2.1	11	7.21231	0.655665
2021-08-22	38.7	20.2	29.45	22.9137	2021-08-22	80.1	48.1	64.1	1.07	9	5.59704	0.621893
2021-08-23	39.9	22.5	31.2	22.7141	2021-08-23	77.4	38.5	57.95	1.56	11	6.4679	0.587991
2021-08-24	34	23.6	28.8	23.1905	2021-08-24	70.7	34.6	52.65	2.35	8	6.37895	0.797369
2021-08-25	34.7	23.7	29.2	22.9283	2021-08-25	75.2	34.4	54.8	2.63	9	6.47148	0.719053
2021-08-26	37.5	24.1	30.8	22.4435	2021-08-26	81.5	44.3	62.9	2.25	11	6.81672	0.619702
2021-08-27	39.6	21.9	30.75	21.8747	2021-08-27	78.2	39.4	58.8	1.61	10	6.26594	0.626594
2021-08-28	39.5	24.3	31.9	21.7617	2021-08-28	78	30.7	54.35	1.91	10	6.64975	0.664975
2021-08-29	35.3	23.1	29.2	22.3489	2021-08-29	79.7	42.4	61.05	2.35	9	6.41183	0.712426
2021-08-30	32.6	23.1	27.85	22.6562	2021-08-30	80.5	46	63.25	2.65	10	6.21569	0.621569
2021-08-31	34.3	23	28.65	22.5748	2021-08-31	75.6	33.8	54.7	2.96	9	6.64265	0.738072
2021-09-01	33.6	23	28.3	22.2443	2021-09-01	79.4	41.6	60.5	2.44	10	6.28533	0.628533
2021-09-02	31.8	23.8	27.8	22.304	2021-09-02	78.6	28.2	53.4	2.73	8	6.09935	0.762419
2021-09-03	30.7	23.1	26.9	24.3497	2021-09-03	76.5	30.5	53.5	3.98	10	8.13536	0.813536
2021-09-04	32	15.9	23.95	23.5147	2021-09-04	80.1	37.9	59	2.27	14	6.33103	0.452217
2021-09-05	34	19.8	26.9	22.2485	2021-09-05	82.3	34.1	58.2	2.21	10	6.33641	0.633641
2021-09-06	34	21.2	27.6	21.712	2021-09-06	77.9	53.2	65.55	2.17	10	6.13974	0.613974
2021-09-07	34.3	20.6	27.45	21.4546	2021-09-07	75.1	55.3	65.2	2.15	13	6.0442	0.464938
2021-09-08	34	20.9	27.45	17.3	2021-09-08	78.3	32.2	55.25	2.23	7	5.38503	0.76929
2021-09-09	32.4	22.7	27.55	21.5585	2021-09-09	63.4	33	48.2	2.98	12	6.32169	0.526808
2021-09-10	30	22.4	26.2	22.2925	2021-09-10	72.1	35.4	53.75	3.94	10	6.41527	0.641527
2021-09-11	29.6	21.6	25.6	22.121	2021-09-11	76.8	32.9	54.85	3.69	8	6.17749	0.772187
2021-09-12	32.3	20.1	26.2	21.81	2021-09-12	77	31.9	54.45	3.5	11	6.70014	0.609103
2021-09-13	29.3	20.5	24.9	18.6	2021-09-13	77.6	31	54.3	2.69	11	5.15477	0.468615
2021-09-14	30.8	19.9	25.35	21.1468	2021-09-14	80.2	33.2	56.7	3.06	11	5.86172	0.532883
2021-09-15	27.9	18.9	23.4	20.3785	2021-09-15	69.9	48.6	59.25	1.89	8	4.52218	0.565272
2021-09-16	28.7	16.5	22.6	20.264	2021-09-16	74	45.8	59.9	1.62	6	4.38048	0.73008
2021-09-17	29.5	16.8	23.15	20.7518	2021-09-17	79.3	45.6	62.45	2.03	6	5.08	0.846666
2021-09-18	31.3	17.4	24.35	20.409	2021-09-18	76.8	30.9	53.85	2.07	10	5.31352	0.531352
2021-09-19	31.7	18.4	25.05	20.0699	2021-09-19	75.9	27.4	51.65	2.23	8	5.41441	0.676801
2021-09-20	33.1	20.4	26.75	19.873	2021-09-20	73.9	34.8	54.35	2.65	10	6.09803	0.609803
2021-09-21	32.8	16.8	24.8	19.3785	2021-09-21	79	39	59	1.89	7	5.06931	0.724187
2021-09-22	31.4	17.7	24.55	19.2898	2021-09-22	48.2	24.4	36.3	2.21	10	5.04995	0.504995
2021-09-23	27.8	14.6	21.2	19.5338	2021-09-23	62.3	29.3	45.8	1.97	4	4.30917	1.07729
2021-09-24	24.4	16.3	20.35	20.9238	2021-09-24	69.4	30.4	49.9	2.73	5	5.02003	1.00401
2021-09-25	27.2	10.8	19	20.3545	2021-09-25	73.3	38.8	56.05	1.85	6	4.4757	0.74595
2021-09-26	29.5	12.2	20.85	19.6479	2021-09-26	77.7	51.2	64.45	1.62	6	4.4874	0.747901
2021-09-27	32	11.3	21.65	19.2633	2021-09-27	79.3	45.4	62.35	1.74	6	4.83578	0.805963
2021-09-28	30.5	17.6	24.05	18.5665	2021-09-28	68.5	31.8	50.15	2.2	9	4.91951	0.546612
2021-09-29	30	17.7	23.85	18.7817	2021-09-29	71.6	31.6	51.6	2.81	7	5.29527	0.756467
2021-09-30	29	18.7	23.85	14.1	2021-09-30	78	26.5	52.25	2.85	10	4.90276	0.490276
2021-10-01	29.3	16.8	23.05	17.9728	2021-10-01	80.7	36	58.35	1.9	10	4.41697	0.441697
2021-10-02	31.7	12.5	22.1	16.8966	2021-10-02	78.6	56.1	67.35	0.66	5	3.09431	0.618862
2021-10-03	28.7	19.2	23.95	16.9584	2021-10-03	88.3	61.3	74.8	1.19	6	3.63914	0.606523
2021-10-04	26.3	16	21.15	19.8141	2021-10-04	79	34.1	56.55	3.58	8	5.88855	0.736069
2021-10-05	25.8	15.7	20.75	19.7274	2021-10-05	80.1	58.6	69.35	3.42	8	5.75744	0.71968
2021-10-06	25	14.2	19.6	19.0124	2021-10-06	88.3	61.3	74.8	2.5	8	4.73373	0.591716
2021-10-07	26.8	9.28	18.04	18.4371	2021-10-07	83.9	62.9	73.4	1.86	7	4.12423	0.589176
2021-10-08	28.4	8.44	18.42	16.8839	2021-10-08	88.8	42.1	65.45	0.43	4	2.4175	0.604374
2021-10-09	30.2	7.98	19.09	16.8211	2021-10-09	80.6	38.3	59.45	0.77	5	2.96568	0.593136
2021-10-10	31.6	10.3	20.95	16.2694	2021-10-10	78.6	25.9	52.25	0.83	6	3.09737	0.516228
2021-10-11	32.1	12.3	22.2	15.8032	2021-10-11	78.2	38.4	58.3	0.68	6	2.85783	0.476305
2021-10-12	30	12.5	21.25	16.1929	2021-10-12	55.1	30.8	42.95	1.39	4	3.6465	0.911626
2021-10-13	23.2	13.7	18.45	15.5956	2021-10-13	67.8	32.8	50.3	1.11	5	2.60062	0.520124
2021-10-14	28.7	11.4	20.05	15.2733	2021-10-14	74.5	31.5	53	1.05	4	2.94675	0.736687
2021-10-15	29.3	13.8	21.55	15.0473	2021-10-15	75.3	34	54.65	0.99	6	2.97189	0.495314
2021-10-16	26.9	11.8	19.35	16.8547	2021-10-16	79.4	43	61.2	3.02	5	4.49548	0.899096
2021-10-17	24.4	14.2	19.3	15.9239	2021-10-17	84.9	64.7	74.8	2.38	5	3.50032	0.700064
2021-10-18	25.2	12.6	18.9	15.4858	2021-10-18	88.5	47.2	67.85	1.85	5	3.27378	0.654756
2021-10-19	25.7	16.3	21	14.8852	2021-10-19	78.3	45.1	61.7	1.43	5	3.13802	0.627604
2021-10-20	24.3	12.8	18.55	15.9698	2021-10-20	82.6	55.8	69.2	1.91	6	3.53712	0.58952
2021-10-21	24.4	6.53	15.465	16.0689	2021-10-21	85.8	55.1	70.45	1.47	5	3.0412	0.608241
2021-10-22	24.3	11.8	18.05	14.8637	2021-10-22	87.6	65.5	76.55	1.1	4	2.59468	0.64867
2021-10-23	25.1	10.4	17.75	14.1135	2021-10-23	88.8	49.8	69.3	0.56	4	2.01926	0.504814
2021-10-24	24.6	12.4	18.5	14.3956	2021-10-24	83.9	49	66.45	0.62	4	2.07667	0.519167
2021-10-25	23.9	12.1	18	14.4473	2021-10-25	80.6	53.4	67	0.85	5	2.29111	0.458221
2021-10-26	25.2	9.2	17.2	12.2	2021-10-26	86.3	45	65.65	0.74	5	2.10202	0.420404
2021-10-27	24.1	10.3	17.2	14.2086	2021-10-27	80.5	46.1	63.3	1.14	4	2.48625	0.621563
2021-10-28	23	14.2	18.6	14.2179	2021-10-28	87.9	66.5	77.2	1.74	4	2.938	0.7345
2021-10-29	21.2	11.3	16.25	10.4	2021-10-29	88	64.4	76.2	1.02	5	1.77033	0.354065
2021-10-30	22.4	9.2	15.8	13.9351	2021-10-30	85.5	52.1	68.8	1.85	4	2.50396	0.625991
2021-10-31	24.1	11.2	17.65	12.7763	2021-10-31	86.6	47.7	67.15	1.24	3	2.19928	0.733093
												0.649635
