# Supplementary material for: Estimation of reference evapotranspiration using some class-A pan evaporimeter pan coefficient estimation models in Mediterranean–Southeastern Anatolian transitional zone conditions of Turkey
Source: PeerJ. 2024 Jul 12;12:e17685. doi: 10.7717/peerj.17685 (PMC11249018; doi:10.7717/peerj.17685)
Supplement: Supplemental Information 3 [file peerj-12-17685-s003.xlsx]

## Sheet: Sayfa1
2020	Actual	Cuenca	FAO-56	Modified Snyder	Orang	Snyder	Wahed & Snyder				2021	Actual	Cuenca	FAO-56	Modified Snyder	Orang	Snyder	Wahed & Snyder
1-Jul	7.75	9.03521	7.31168	9.32109	9.37108	10.5061	8.37298				1-Jul	7.64784	8.86671	7.74437	9.2123	9.2596	10.3067	8.27483
2-Jul	6.99	9.26284	8.03928	9.48004	9.53465	10.7888	8.51685				2-Jul	8.64362	10.575	8.6604	10.8577	10.9182	12.3063	9.75388
3-Jul	6.87	8.11606	7.1842	8.4596	8.50209	9.43405	7.5985				3-Jul	8.04324	7.93938	6.39395	8.09165	8.13954	9.2582	7.26976
4-Jul	6.33	7.30924	6.6512	7.67234	7.70911	8.49889	6.89095				4-Jul	7.75486	7.95125	6.44559	8.1004	8.14855	9.27367	7.27768
5-Jul	8.12	8.95434	7.67182	9.26924	9.31803	10.41	8.32626				5-Jul	7.58206	7.80607	6.539	7.99837	8.04384	9.08867	7.18552
6-Jul	7.95	9.14229	7.81904	9.39592	9.44817	10.6381	8.44077				6-Jul	7.29709	8.59287	7.22985	8.77986	8.83096	10.0126	7.8879
7-Jul	7.89	6.77654	5.74648	6.83269	6.87781	7.95529	6.13994				7-Jul	8.86742	8.38898	6.78668	8.63708	8.68413	9.75736	7.75874
8-Jul	6.97	8.7725	7.09473	8.90858	8.96307	10.2461	8.00417				8-Jul	8.38804	8.24431	6.97938	8.54175	8.58635	9.58376	7.67267
9-Jul	7.36	8.3978	6.79349	8.64308	8.6903	9.76816	7.76416				9-Jul	8.20307	7.74909	6.55295	7.95919	8.00361	9.01776	7.15012
10-Jul	7.81	8.45969	7.11249	8.68678	8.73533	9.84507	7.80376				10-Jul	9.19919	6.94372	5.53786	7.1653	7.20358	8.0736	6.43641
11-Jul	7.99	7.91542	6.66019	8.0757	8.1233	9.22768	7.25544				11-Jul	7.78081	8.50285	7.12912	8.71657	8.76592	9.8988	7.83068
12-Jul	7.91	7.38933	6.00544	7.48287	7.5299	8.64451	6.72353				12-Jul	8.92927	10.6191	8.50927	10.8873	10.9485	12.3609	9.78059
13-Jul	7.71	9.78185	7.90008	10.0729	10.1277	11.3771	9.04854				13-Jul	9.20621	8.82276	7.30138	9.18158	9.22784	10.254	8.24692
14-Jul	8.36	8.22191	6.77258	8.52598	8.57005	9.55662	7.65835				14-Jul	7.91222	8.81817	7.59077	9.18018	9.22654	10.2496	8.24576
15-Jul	8.2	10.9154	9.15181	11.3379	11.3959	12.687	10.184				15-Jul	8.967	9.30643	7.66834	9.76298	9.80934	10.8183	8.76839
16-Jul	8.34	7.25141	6.10796	7.38161	7.42597	8.46088	6.63207				16-Jul	8.28635	10.2115	8.69669	10.6159	10.6699	11.869	9.5354
17-Jul	7.62	7.44292	6.15962	7.52407	7.57228	8.71801	6.76081				17-Jul	8.20377	9.06339	7.7396	9.34213	9.39291	10.5414	8.39215
18-Jul	7.03	8.19959	6.59522	8.28533	8.33852	9.60692	7.44484				18-Jul	8.06493	8.29701	7.09426	8.57708	8.62268	9.6469	7.70463
19-Jul	6.88	9.28219	7.66319	9.49196	9.54671	10.8127	8.5275				19-Jul	7.77404	8.24111	7.11729	8.54034	8.58496	9.58034	7.67143
20-Jul	7.15	7.94849	6.95295	8.10047	8.14887	9.27076	7.27791				20-Jul	8.28457	8.23836	6.83529	8.5371	8.5815	9.57628	7.66841
21-Jul	8.9	10.9711	8.91188	11.1399	11.2082	12.8149	10.009				21-Jul	8.40166	10.7873	8.4487	11.0049	11.0693	12.574	9.88689
22-Jul	8.93	10.8921	8.95728	11.3217	11.3792	12.6591	10.1693				22-Jul	8.53444	9.50193	7.31954	9.64826	9.70703	11.0974	8.66861
23-Jul	8.6	10.2498	8.53664	10.6399	10.6945	11.9134	9.55703				23-Jul	8.72943	7.52629	6.20022	7.80861	7.84882	8.74786	7.01394
24-Jul	7.84	8.9962	7.74107	9.29726	9.34683	10.4603	8.3516				24-Jul	7.98186	8.88356	7.44083	9.22172	9.26912	10.3256	8.28323
25-Jul	8.25	9.59298	7.99036	9.71854	9.77952	11.2201	8.73235				25-Jul	7.68491	8.97854	7.66355	9.28518	9.33439	10.4389	8.34066
26-Jul	7.13	9.94428	8.00935	10.1847	10.2426	11.5784	9.14959				26-Jul	6.80682	7.8772	6.88274	8.04953	8.09653	9.1791	7.23186
27-Jul	6.69	7.74747	6.81301	7.95921	8.00375	9.01629	7.15022				27-Jul	7.73662	6.87425	5.84011	7.12087	7.15812	7.99127	6.39637
28-Jul	6.54	8.27725	7.39695	8.56536	8.61078	9.624	7.69413				28-Jul	8.74878	7.02362	5.87262	7.49423	7.52585	8.1817	6.72975
29-Jul	5.62	6.96976	6.13088	7.18565	7.22477	8.10662	6.455				29-Jul	9.05047	8.36568	6.99804	8.89597	8.93442	9.73968	7.98874
30-Jul	8.08	9.54586	8.03205	9.9175	9.96819	11.0952	8.90814				30-Jul	8.39305	10.0621	8.48598	10.5191	10.5705	11.6955	9.44791
31-Jul	8.45	8.9496	7.43695	9.26493	9.31348	10.4038	8.32228				31-Jul	9.32933	7.96716	6.54335	8.36198	8.40154	9.26168	7.51007
1-Aug	8.22	8.19441	6.74583	8.50791	8.55148	9.52413	7.64201				1-Aug	9.6009	10.0737	8.20305	10.5248	10.5762	11.7078	9.45298
2-Aug	8.21	9.65852	7.96597	9.9909	10.0435	11.2283	8.97444				2-Aug	8.50698	9.96475	8.45329	10.4577	10.5075	11.5847	9.39243
3-Aug	7.9	7.51219	6.24601	7.79968	7.83967	8.7314	7.00588				3-Aug	8.3645	9.3451	7.95166	9.78888	9.83609	10.8632	8.7919
4-Aug	7.94	10.6176	8.88664	10.888	10.9495	12.3598	9.7814				4-Aug	8.4502	7.90981	6.75189	8.32761	8.36636	9.19811	7.4791
5-Aug	7.74	8.68198	6.99829	8.84233	8.89499	10.1269	7.94427				5-Aug	8.97283	8.68684	7.2907	9.09497	9.13889	10.0975	8.16865
6-Aug	7.71	8.58884	6.83038	8.77521	8.82599	10.0067	7.88357				6-Aug	7.30071	6.18962	5.37514	6.4112	6.44485	7.19579	5.75896
7-Aug	8.08	9.64869	7.77545	9.98338	10.0357	11.2161	8.96758				7-Aug	6.72523	5.65842	4.89048	5.80465	5.83745	6.58682	5.21472
8-Aug	8.35	7.95791	6.5447	8.10561	8.15395	9.28246	7.28242				8-Aug	6.01313	7.15108	6.31947	7.31095	7.35351	8.332	6.56828
9-Aug	7.52	8.92666	7.29337	9.02484	9.08254	10.4549	8.10929				9-Aug	6.94959	5.63304	4.78929	5.78679	5.81906	6.55513	5.19855
10-Aug	6.76	8.23997	6.58968	8.31649	8.37051	9.66327	7.47299				10-Aug	6.77449	7.63975	6.45222	7.88481	7.92719	8.88395	7.08287
11-Aug	6.73	8.06358	6.32801	8.1818	8.23207	9.42154	7.35119				11-Aug	7.23362	6.83445	5.81894	7.09474	7.13128	7.94417	6.37276
12-Aug	6.99	7.60902	6.23135	7.86322	7.9049	8.84636	7.06329				12-Aug	6.22044	8.94667	7.90593	9.26528	9.31407	10.4015	8.32275
13-Aug	8.21	8.86052	7.12217	9.20497	9.25175	10.2975	8.26799				13-Aug	6.32798	9.4915	8.25821	9.64432	9.70343	11.0845	8.66537
14-Aug	8.25	8.8335	7.43881	9.47562	9.51417	10.3003	8.50866				14-Aug	6.30615	8.50749	7.39786	8.72095	8.77055	9.90511	7.83472
15-Aug	8.32	9.5619	7.99029	10.2099	10.2528	11.1399	9.16837				15-Aug	7.01132	8.27645	7.04893	8.56326	8.60846	9.62219	7.69212
16-Aug	7.77	9.76208	8.28794	10.3319	10.3782	11.3584	9.2787				16-Aug	7.33269	8.92223	7.3836	9.24666	9.2947	10.3711	8.30576
17-Aug	8.24	9.31705	7.6303	9.76939	9.81591	10.8302	8.77417				17-Aug	7.01442	9.78301	8.26755	10.0755	10.1306	11.3794	9.05103
18-Aug	8.04	8.90179	7.30139	9.23284	9.28047	10.3467	8.29324				18-Aug	7.69422	6.41432	5.23364	6.56275	6.60039	7.4706	5.89586
19-Aug	7.75	8.43955	6.83178	8.67165	8.71965	9.81955	7.78999				19-Aug	7.09364	9.3035	7.74164	9.50729	9.56249	10.8399	8.54138
20-Aug	7.73	8.0403	6.38985	8.16488	8.21473	9.39056	7.33593				20-Aug	8.33884	9.64263	7.94683	9.98032	10.0326	11.2093	8.96487
21-Aug	7.06	8.8509	7.15478	8.96701	9.02309	10.3513	8.05699				21-Aug	7.21231	7.30651	6.32225	7.66908	7.70561	8.4948	6.8879
22-Aug	6.95	8.49848	6.80976	8.97511	9.01556	9.88416	8.06017				22-Aug	5.59704	6.00359	5.47388	6.2921	6.32259	6.9801	5.65137
23-Aug	7.53	9.51101	7.91115	10.1794	10.2213	11.0851	9.14071				23-Aug	6.4679	7.33201	6.50874	7.68598	7.72306	8.52426	6.90323
24-Aug	6.75	8.11869	7.0467	8.75095	8.78555	9.47707	7.85772				24-Aug	6.37895	5.74043	4.89108	5.86191	5.89624	6.69028	5.26646
25-Aug	5.89	6.60592	5.897	6.95003	6.98272	7.68216	6.24202				25-Aug	6.47148	6.61789	5.57278	6.71089	6.75267	7.73622	6.02983
26-Aug	6.7	7.4042	6.41315	7.73112	7.76936	8.60638	6.94399				26-Aug	6.81672	7.77178	6.65234	7.97521	8.0201	9.0461	7.16462
27-Aug	7.09	7.15896	6.02338	7.3153	7.35785	8.34155	6.57212				27-Aug	6.26594	7.0068	6.18391	7.21086	7.25068	8.15189	6.4778
28-Aug	6.47	7.62951	6.44398	7.87793	7.92012	8.87157	7.07666				28-Aug	6.64975	6.92638	6.02691	7.15621	7.19449	8.05401	6.42837
29-Aug	6.07	7.51164	6.63108	7.80125	7.84147	8.73187	7.00743				29-Aug	6.41183	6.44848	5.49429	6.5879	6.62634	7.51442	5.91867
30-Aug	5.41	6.31942	5.8081	6.77688	6.80489	7.36983	6.08553				30-Aug	6.21569	7.25647	6.10144	7.38524	7.4297	8.46748	6.63535
31-Aug	5.49	7.28264	6.65353	7.65577	7.69208	8.46895	6.87597				31-Aug	6.64265	6.50524	5.3947	6.62788	6.66734	7.58728	5.95476
1-Sep	6.39	6.70289	5.94098	7.01095	7.0453	7.792	6.29708				1-Sep	6.28533	7.16827	6.08279	7.32212	7.36488	8.35352	6.5783
2-Sep	5.55	6.00291	5.3814	6.29129	6.32173	6.97909	5.65061				2-Sep	6.09935	5.81873	4.87553	5.918	5.95383	6.79174	5.31714
3-Sep	3.74	5.88833	5.41081	6.22035	6.24888	6.85081	5.58651				3-Sep	8.13536	6.43882	5.15856	6.84375	6.87321	7.49498	6.14572
4-Sep	5.04	5.75683	5.32067	6.14058	6.16693	6.70717	5.5144				4-Sep	6.33103	9.11807	7.84764	9.64793	9.69131	10.6091	8.6645
5-Sep	6.26	7.12319	6.32945	7.55657	7.59009	8.2914	6.78624				5-Sep	6.33641	6.77731	5.82374	7.05781	7.09336	7.87738	6.33939
6-Sep	6.42	7.39789	6.42311	7.72716	7.7653	8.59916	6.94041				6-Sep	6.13974	6.9126	5.94305	7.14668	7.18467	8.03728	6.41973
7-Sep	6.19	6.22342	5.39275	6.43359	6.46785	7.23615	5.7792				7-Sep	6.0442	9.10703	7.83262	9.37201	9.42363	10.5948	8.41917
8-Sep	5.9	6.16771	5.38788	6.3969	6.43017	7.16987	5.74604				8-Sep	5.38503	5.05124	4.32791	5.14955	5.18016	5.89054	4.62658
9-Sep	7.05	8.60026	7.4317	9.34113	9.37609	10.0571	8.38714				9-Sep	6.32169	8.5833	7.11103	8.7726	8.82344	10.0002	7.8813
10-Sep	5.99	8.96675	7.91392	9.55724	9.59822	10.4447	8.58258				10-Sep	6.41527	7.30259	5.80341	7.41762	7.4628	8.52788	6.6645
11-Sep	4.46	3.95729	3.66901	4.16667	4.18624	4.60264	3.74222				11-Sep	6.17749	5.81534	4.67166	5.91469	5.95034	6.78705	5.31408
12-Sep	4.32	5.4872	5.01899	5.6902	5.71997	6.3794	5.11133				12-Sep	6.70014	7.85486	6.36174	8.03158	8.07785	9.14983	7.21547
13-Sep	5.63	5.68681	5.02749	6.09779	6.12287	6.63139	5.47565				13-Sep	5.15477	7.98578	6.70281	8.12638	8.17535	9.31901	7.30124
14-Sep	5.9	6.40308	5.38265	6.55559	6.59311	7.4567	5.88943				14-Sep	5.86172	8.01107	6.61567	8.14441	8.19382	9.35213	7.3175
15-Sep	4.78	4.99374	4.46354	5.10938	5.13896	5.81723	4.59032				15-Sep	4.52218	5.92797	5.16757	6.00001	6.03818	6.93827	5.39134
16-Sep	4.86	6.96713	6.26391	7.18441	7.22355	8.1037	6.45392				16-Sep	4.38048	4.41454	3.89733	4.4765	4.50449	5.16111	4.02226
17-Sep	5.48	6.48034	5.7331	6.61141	6.65058	7.55557	5.93998				17-Sep	5.08	4.18686	3.62152	4.31451	4.33804	4.86993	3.8758
18-Sep	5.76	5.786	4.87981	5.89436	5.92956	6.74899	5.29578				18-Sep	5.31352	6.88464	5.94768	7.12823	7.16573	8.00391	6.40306
19-Sep	5.97	5.62957	4.72909	5.78414	5.81631	6.55072	5.19614				19-Sep	5.41441	5.57764	4.78033	5.7492	5.78046	6.48724	5.16458
20-Sep	5.69	7.15465	6.12372	7.31269	7.35521	8.33623	6.5698				20-Sep	6.09803	6.89823	5.80486	7.13649	7.17414	8.01973	6.41048
21-Sep	4.27	5.0138	4.35782	5.12307	5.15299	5.84253	4.60267				21-Sep	5.06931	4.95139	4.30978	5.07939	5.10811	5.76386	4.56318
22-Sep	5.08	5.7275	5.19126	5.85389	5.88813	6.67421	5.25929				22-Sep	5.04995	7.24729	6.21592	7.37906	7.42341	8.45563	6.6298
23-Sep	5.46	6.51366	5.46672	6.63423	6.6739	7.59832	5.96052				23-Sep	4.30917	2.97112	2.58069	3.00541	3.02464	3.47891	2.70055
24-Sep	5.41	5.81852	4.85378	5.91776	5.95357	6.79144	5.31691				24-Sep	5.02003	3.4149	2.86543	3.54562	3.56382	3.96921	3.18479
25-Sep	5.3	6.68021	5.59879	6.75782	6.80087	7.82087	6.07224				25-Sep	4.4757	4.11749	3.59485	4.26833	4.29061	4.78664	3.83407
26-Sep	4.44	5.08563	4.28586	5.17415	5.2054	5.93524	4.64879				26-Sep	4.4874	4.04983	3.58006	4.2245	4.24559	4.70751	3.79445
27-Sep	5.07	5.74381	4.80713	5.86395	5.8983	6.69448	5.26828				27-Sep	4.83578	4.09594	3.59631	4.25428	4.27618	4.76124	3.82137
28-Sep	5.12	7.0537	5.96473	7.24188	7.28243	8.20922	6.50576				28-Sep	4.91951	6.33763	5.43753	6.51068	6.54702	7.3752	5.84887
29-Sep	4.53	5.51953	4.91432	5.71107	5.74136	6.41759	5.13016				29-Sep	5.29527	5.00228	4.17536	5.11421	5.1438	5.82759	4.5946
30-Sep	5.97	6.3353	5.36228	6.50874	6.545	7.37216	5.8471				30-Sep	4.90276	7.0619	5.88492	7.24714	7.28779	8.21922	6.51049
1-Oct	3.95	5.21656	4.52811	5.27255	5.30655	6.11167	4.73779				1-Oct	4.41697	7.00605	6.09649	7.20999	7.24975	8.1508	6.47699
2-Oct	3.68	4.44724	3.90892	4.50107	4.52973	5.20543	4.04447				2-Oct	3.09431	3.56697	3.3313	3.64998	3.67117	4.15535	3.27921
3-Oct	4.33	5.54198	4.75544	5.72525	5.75585	6.4441	5.14293				3-Oct	3.63914	4.13213	3.73168	4.27852	4.30113	4.80433	3.84331
4-Oct	4.76	4.00569	3.47548	4.19601	4.21629	4.65663	3.76868				4-Oct	5.88855	5.19955	4.23019	5.50496	5.52939	6.04938	4.94369
5-Oct	4.68	5.81818	5.10118	6.17627	6.20349	6.7728	5.54659				5-Oct	5.75744	5.1106	4.19743	5.45134	5.47432	5.95267	4.89523
6-Oct	3.8	4.51212	4.1169	4.79661	4.81765	5.25398	4.30759				6-Oct	4.73373	5.18531	4.4203	5.49755	5.52189	6.03463	4.93707
7-Oct	3.81	5.28375	4.79728	5.55977	5.58595	6.14486	4.99341				7-Oct	4.12423	4.71619	4.12125	4.92283	4.94726	5.48201	4.42165
8-Oct	3.7	3.34804	3.03536	3.5036	3.52075	3.89229	3.14687				8-Oct	2.4175	2.74568	2.62297	2.84676	2.86172	3.19233	2.55718
9-Oct	3.21	4.63495	4.27496	4.87234	4.89548	5.39004	4.37607				9-Oct	2.96568	3.42215	3.17498	3.55169	3.57018	3.97852	3.19035
10-Oct	3.99	5.30517	4.69081	5.57259	5.59907	6.16859	5.00496				10-Oct	3.09737	4.07659	3.76826	4.24242	4.26407	4.73899	3.8107
11-Oct	3.88	4.75719	4.1885	4.94943	4.97461	5.52971	4.44571				11-Oct	2.85783	3.99704	3.74285	4.19169	4.21196	4.64753	3.76484
12-Oct	2.91	2.77472	2.57592	2.86587	2.88134	3.22695	2.57445				12-Oct	3.6465	2.7447	2.45223	2.84561	2.86049	3.19089	2.55611
13-Oct	2.86	2.75825	2.56718	2.85491	2.87008	3.20719	2.56454				13-Oct	2.60062	3.78322	3.44158	3.81118	3.83675	4.44588	3.42492
14-Oct	3.58	3.57224	3.18791	3.65326	3.67449	4.16186	3.28215				14-Oct	2.94675	2.93625	2.67296	2.97951	2.99808	3.4317	2.67717
15-Oct	4.37	5.05154	4.36031	5.14988	5.18052	5.89096	4.62689				15-Oct	2.97189	4.22587	3.85839	4.34188	4.36624	4.91818	3.9006
16-Oct	4.15	5.04732	4.29501	5.14661	5.17712	5.88542	4.62391				16-Oct	4.49548	3.59128	2.97011	3.66581	3.68729	4.18579	3.29342
17-Oct	3.56	3.59053	3.17314	3.6661	3.68767	4.18512	3.29375				17-Oct	3.50032	3.69193	3.14498	3.7399	3.76344	4.31862	3.36043
18-Oct	3.18	4.28589	3.86025	4.38347	4.40895	4.99326	3.93818				18-Oct	3.27378	3.67345	3.20643	3.72632	3.74952	4.29374	3.34817
19-Oct	2.85	2.9464	2.69753	2.98712	3.0059	3.44533	2.68405				19-Oct	3.13802	3.50179	3.11918	3.60445	3.62434	4.07403	3.23802
20-Oct	3.27	4.41656	3.90119	4.47801	4.50605	5.16383	4.02363				20-Oct	3.53712	4.0761	3.55103	4.24122	4.26276	4.73791	3.80956
21-Oct	2.67	3.56998	3.41517	3.65224	3.67351	4.15922	3.28127				21-Oct	3.0412	3.47028	3.08568	3.58314	3.60245	4.03571	3.21875
22-Oct	2.34	3.54646	3.32301	3.63566	3.65646	4.12955	3.26627				22-Oct	2.59468	2.80398	2.54351	2.88545	2.90144	3.26242	2.59214
23-Oct	2.74	3.61147	3.30988	3.68145	3.70348	4.21222	3.30765				23-Oct	2.01926	2.8791	2.71119	2.9381	2.95556	3.35683	2.63975
24-Oct	2.3	3.407	3.19101	3.54187	3.5601	3.96075	3.18148				24-Oct	2.07667	2.68369	2.52338	2.80653	2.82038	3.12004	2.52081
25-Oct	2.3	3.29299	3.10557	3.46943	3.48568	3.83032	3.116				25-Oct	2.29111	3.3952	3.13425	3.53407	3.55207	3.94687	3.17442
26-Oct	2.3	2.72634	2.54737	2.83396	2.84855	3.16945	2.5456				26-Oct	2.10202	3.45249	3.2083	3.57173	3.59078	4.01458	3.20848
27-Oct	2.3	3.38376	3.15382	3.52676	3.54458	3.93362	3.16782				27-Oct	2.48625	2.83231	2.56271	2.90491	2.92142	3.29746	2.60973
28-Oct	2.81	2.63061	2.38823	2.77287	2.78577	3.05982	2.49036				28-Oct	2.938	2.81502	2.46824	2.89269	2.90884	3.27586	2.59866
29-Oct	2.3	4.1846	3.74572	4.3135	4.33706	4.86744	3.87493				29-Oct	1.77033	3.86646	3.54844	3.87944	3.90689	4.56868	3.48663
30-Oct	2.44	2.85126	2.6283	2.91827	2.93516	3.32131	2.62181				30-Oct	2.50396	3.04692	2.66965	3.06505	3.08592	3.58619	2.75447
31-Oct	2.2	2.0859	1.90651	2.15257	2.16425	2.42603	1.9337				31-Oct	2.19928	2.29626	2.07719	2.30797	2.32389	2.70586	2.07416
