# Supplementary material for: Estimation of reference evapotranspiration using some class-A pan evaporimeter pan coefficient estimation models in Mediterranean–Southeastern Anatolian transitional zone conditions of Turkey
Source: PeerJ. 2024 Jul 12;12:e17685. doi: 10.7717/peerj.17685 (PMC11249018; doi:10.7717/peerj.17685)
Supplement: Supplemental Information 4 [file peerj-12-17685-s004.xlsx]

## Sheet: Sayfa1
2020	Actual	Cuenca	FAO-56	Modified Snyder	Orang	Pereira	Snyder	Wahed Snyder
1-Jul	7.75	9.03521	7.31168	9.32109	9.37108	5.83719	10.5061	8.37298
2-Jul	6.99	9.26284	8.03928	9.48004	9.53465	7.41843	10.7888	8.51685
3-Jul	6.87	8.11606	7.1842	8.4596	8.50209	7.24577	9.43405	7.5985
4-Jul	6.33	7.30924	6.6512	7.67234	7.70911	7.30651	8.49889	6.89095
5-Jul	8.12	8.95434	7.67182	9.26924	9.31803	6.95976	10.41	8.32626
6-Jul	7.95	9.14229	7.81904	9.39592	9.44817	6.95745	10.6381	8.44077
7-Jul	7.89	6.77654	5.74648	6.83269	6.87781	4.68793	7.95529	6.13994
8-Jul	6.97	8.7725	7.09473	8.90858	8.96307	5.399	10.2461	8.00417
9-Jul	7.36	8.3978	6.79349	8.64308	8.6903	5.36409	9.76816	7.76416
10-Jul	7.81	8.45969	7.11249	8.68678	8.73533	6.08716	9.84507	7.80376
11-Jul	7.99	7.91542	6.66019	8.0757	8.1233	5.60084	9.22768	7.25544
12-Jul	7.91	7.38933	6.00544	7.48287	7.5299	4.5585	8.64451	6.72353
13-Jul	7.71	9.78185	7.90008	10.0729	10.1277	6.23693	11.3771	9.04854
14-Jul	8.36	8.22191	6.77258	8.52598	8.57005	5.64525	9.55662	7.65835
15-Jul	8.2	10.9154	9.15181	11.3379	11.3959	7.92348	12.687	10.184
16-Jul	8.34	7.25141	6.10796	7.38161	7.42597	5.10843	8.46088	6.63207
17-Jul	7.62	7.44292	6.15962	7.52407	7.57228	4.8183	8.71801	6.76081
18-Jul	7.03	8.19959	6.59522	8.28533	8.33852	4.84803	9.60692	7.44484
19-Jul	6.88	9.28219	7.66319	9.49196	9.54671	6.1616	10.8127	8.5275
20-Jul	7.15	7.94849	6.95295	8.10047	8.14887	6.42349	9.27076	7.27791
21-Jul	8.9	10.9711	8.91188	11.1399	11.2082	6.78153	12.8149	10.009
22-Jul	8.93	10.8921	8.95728	11.3217	11.3792	7.42584	12.6591	10.1693
23-Jul	8.6	10.2498	8.53664	10.6399	10.6945	7.28295	11.9134	9.55703
24-Jul	7.84	8.9962	7.74107	9.29726	9.34683	7.0775	10.4603	8.3516
25-Jul	8.25	9.59298	7.99036	9.71854	9.77952	6.36523	11.2201	8.73235
26-Jul	7.13	9.94428	8.00935	10.1847	10.2426	6.12085	11.5784	9.14959
27-Jul	6.69	7.74747	6.81301	7.95921	8.00375	6.50359	9.01629	7.15022
28-Jul	6.54	8.27725	7.39695	8.56536	8.61078	7.51007	9.624	7.69413
29-Jul	5.62	6.96976	6.13088	7.18565	7.22477	5.91047	8.10662	6.455
30-Jul	8.08	9.54586	8.03205	9.9175	9.96819	7.00178	11.0952	8.90814
31-Jul	8.45	8.9496	7.43695	9.26493	9.31348	6.28815	10.4038	8.32228
1-Aug	8.22	8.19441	6.74583	8.50791	8.55148	5.62643	9.52413	7.64201
2-Aug	8.21	9.65852	7.96597	9.9909	10.0435	6.59912	11.2283	8.97444
3-Aug	7.9	7.51219	6.24601	7.79968	7.83967	5.3375	8.7314	7.00588
4-Aug	7.94	10.6176	8.88664	10.888	10.9495	7.52586	12.3598	9.7814
5-Aug	7.74	8.68198	6.99829	8.84233	8.89499	5.32321	10.1269	7.94427
6-Aug	7.71	8.58884	6.83038	8.77521	8.82599	5.0868	10.0067	7.88357
7-Aug	8.08	9.64869	7.77545	9.98338	10.0357	6.11246	11.2161	8.96758
8-Aug	8.35	7.95791	6.5447	8.10561	8.15395	5.20993	9.28246	7.28242
9-Aug	7.52	8.92666	7.29337	9.02484	9.08254	5.56819	10.4549	8.10929
10-Aug	6.76	8.23997	6.58968	8.31649	8.37051	4.7887	9.66327	7.47299
11-Aug	6.73	8.06358	6.32801	8.1818	8.23207	4.53176	9.42154	7.35119
12-Aug	6.99	7.60902	6.23135	7.86322	7.9049	5.11381	8.84636	7.06329
13-Aug	8.21	8.86052	7.12217	9.20497	9.25175	5.64172	10.2975	8.26799
14-Aug	8.25	8.8335	7.43881	9.47562	9.51417	6.84167	10.3003	8.50866
15-Aug	8.32	9.5619	7.99029	10.2099	10.2528	7.1732	11.1399	9.16837
16-Aug	7.77	9.76208	8.28794	10.3319	10.3782	7.73065	11.3584	9.2787
17-Aug	8.24	9.31705	7.6303	9.76939	9.81591	6.45308	10.8302	8.77417
18-Aug	8.04	8.90179	7.30139	9.23284	9.28047	6.07184	10.3467	8.29324
19-Aug	7.75	8.43955	6.83178	8.67165	8.71965	5.39344	9.81955	7.78999
20-Aug	7.73	8.0403	6.38985	8.16488	8.21473	4.69203	9.39056	7.33593
21-Aug	7.06	8.8509	7.15478	8.96701	9.02309	5.37693	10.3513	8.05699
22-Aug	6.95	8.49848	6.80976	8.97511	9.01556	5.55252	9.88416	8.06017
23-Aug	7.53	9.51101	7.91115	10.1794	10.2213	7.08941	11.0851	9.14071
24-Aug	6.75	8.11869	7.0467	8.75095	8.78555	7.08256	9.47707	7.85772
25-Aug	5.89	6.60592	5.897	6.95003	6.98272	6.22977	7.68216	6.24202
26-Aug	6.7	7.4042	6.41315	7.73112	7.76936	6.14049	8.60638	6.94399
27-Aug	7.09	7.15896	6.02338	7.3153	7.35785	5.09048	8.34155	6.57212
28-Aug	6.47	7.62951	6.44398	7.87793	7.92012	5.60679	8.87157	7.07666
29-Aug	6.07	7.51164	6.63108	7.80125	7.84147	6.57453	8.73187	7.00743
30-Aug	5.41	6.31942	5.8081	6.77688	6.80489	6.6858	7.36983	6.08553
31-Aug	5.49	7.28264	6.65353	7.65577	7.69208	7.35697	8.46895	6.87597
1-Sep	6.39	6.70289	5.94098	7.01095	7.0453	6.03462	7.792	6.29708
2-Sep	5.55	6.00291	5.3814	6.29129	6.32173	5.64973	6.97909	5.65061
3-Sep	3.74	5.88833	5.41081	6.22035	6.24888	6.10207	6.85081	5.58651
4-Sep	5.04	5.75683	5.32067	6.14058	6.16693	6.14835	6.70717	5.5144
5-Sep	6.26	7.12319	6.32945	7.55657	7.59009	6.60919	8.2914	6.78624
6-Sep	6.42	7.39789	6.42311	7.72716	7.7653	6.19841	8.59916	6.94041
7-Sep	6.19	6.22342	5.39275	6.43359	6.46785	5.05378	7.23615	5.7792
8-Sep	5.9	6.16771	5.38788	6.3969	6.43017	5.19857	7.16987	5.74604
9-Sep	7.05	8.60026	7.4317	9.34113	9.37609	7.31904	10.0571	8.38714
10-Sep	5.99	8.96675	7.91392	9.55724	9.59822	8.18967	10.4447	8.58258
11-Sep	4.46	3.95729	3.66901	4.16667	4.18624	4.22192	4.60264	3.74222
12-Sep	4.32	5.4872	5.01899	5.6902	5.71997	5.43374	6.3794	5.11133
13-Sep	5.63	5.68681	5.02749	6.09779	6.12287	5.26527	6.63139	5.47565
14-Sep	5.9	6.40308	5.38265	6.55559	6.59311	4.57504	7.4567	5.88943
15-Sep	4.78	4.99374	4.46354	5.10938	5.13896	4.43284	5.81723	4.59032
16-Sep	4.86	6.96713	6.26391	7.18441	7.22355	6.44426	8.1037	6.45392
17-Sep	5.48	6.48034	5.7331	6.61141	6.65058	5.46862	7.55557	5.93998
18-Sep	5.76	5.786	4.87981	5.89436	5.92956	4.11035	6.74899	5.29578
19-Sep	5.97	5.62957	4.72909	5.78414	5.81631	4.04202	6.55072	5.19614
20-Sep	5.69	7.15465	6.12372	7.31269	7.35521	5.44774	8.33623	6.5698
21-Sep	4.27	5.0138	4.35782	5.12307	5.15299	4.06349	5.84253	4.60267
22-Sep	5.08	5.7275	5.19126	5.85389	5.88813	5.3304	6.67421	5.25929
23-Sep	5.46	6.51366	5.46672	6.63423	6.6739	4.59066	7.59832	5.96052
24-Sep	5.41	5.81852	4.85378	5.91776	5.95357	3.99526	6.79144	5.31691
25-Sep	5.3	6.68021	5.59879	6.75782	6.80087	4.57195	7.82087	6.07224
26-Sep	4.44	5.08563	4.28586	5.17415	5.2054	3.65226	5.93524	4.64879
27-Sep	5.07	5.74381	4.80713	5.86395	5.8983	4.03197	6.69448	5.26828
28-Sep	5.12	7.0537	5.96473	7.24188	7.28243	5.18803	8.20922	6.50576
29-Sep	4.53	5.51953	4.91432	5.71107	5.74136	4.9788	6.41759	5.13016
30-Sep	5.97	6.3353	5.36228	6.50874	6.545	4.74432	7.37216	5.8471
1-Oct	3.95	5.21656	4.52811	5.27255	5.30655	4.05831	6.11167	4.73779
2-Oct	3.68	4.44724	3.90892	4.50107	4.52973	3.65107	5.20543	4.04447
3-Oct	4.33	5.54198	4.75544	5.72525	5.75585	4.4394	6.4441	5.14293
4-Oct	4.76	4.00569	3.47548	4.19601	4.21629	3.43373	4.65663	3.76868
5-Oct	4.68	5.81818	5.10118	6.17627	6.20349	5.23904	6.7728	5.54659
6-Oct	3.8	4.51212	4.1169	4.79661	4.81765	4.68897	5.25398	4.30759
7-Oct	3.81	5.28375	4.79728	5.55977	5.58595	5.31872	6.14486	4.99341
8-Oct	3.7	3.34804	3.03536	3.5036	3.52075	3.35615	3.89229	3.14687
9-Oct	3.21	4.63495	4.27496	4.87234	4.89548	4.93175	5.39004	4.37607
10-Oct	3.99	5.30517	4.69081	5.57259	5.59907	4.92836	6.16859	5.00496
11-Oct	3.88	4.75719	4.1885	4.94943	4.97461	4.28177	5.52971	4.44571
12-Oct	2.91	2.77472	2.57592	2.86587	2.88134	2.89568	3.22695	2.57445
13-Oct	2.86	2.75825	2.56718	2.85491	2.87008	2.91131	3.20719	2.56454
14-Oct	3.58	3.57224	3.18791	3.65326	3.67449	3.18887	4.16186	3.28215
15-Oct	4.37	5.05154	4.36031	5.14988	5.18052	3.97943	5.89096	4.62689
16-Oct	4.15	5.04732	4.29501	5.14661	5.17712	3.77855	5.88542	4.62391
17-Oct	3.56	3.59053	3.17314	3.6661	3.68767	3.0949	4.18512	3.29375
18-Oct	3.18	4.28589	3.86025	4.38347	4.40895	3.98118	4.99326	3.93818
19-Oct	2.85	2.9464	2.69753	2.98712	3.0059	2.78265	3.44533	2.68405
20-Oct	3.27	4.41656	3.90119	4.47801	4.50605	3.72523	5.16383	4.02363
21-Oct	2.67	3.56998	3.41517	3.65224	3.67351	3.89037	4.15922	3.28127
22-Oct	2.34	3.54646	3.32301	3.63566	3.65646	3.71812	4.12955	3.26627
23-Oct	2.74	3.61147	3.30988	3.68145	3.70348	3.5027	4.21222	3.30765
24-Oct	2.3	3.407	3.19101	3.54187	3.5601	3.70052	3.96075	3.18148
25-Oct	2.3	3.29299	3.10557	3.46943	3.48568	3.72789	3.83032	3.116
26-Oct	2.3	2.72634	2.54737	2.83396	2.84855	2.95198	3.16945	2.5456
27-Oct	2.3	3.38376	3.15382	3.52676	3.54458	3.65731	3.93362	3.16782
28-Oct	2.81	2.63061	2.38823	2.77287	2.78577	2.68288	3.05982	2.49036
29-Oct	2.3	4.1846	3.74572	4.3135	4.33706	3.91392	4.86744	3.87493
30-Oct	2.44	2.85126	2.6283	2.91827	2.93516	2.86918	3.32131	2.62181
31-Oct	2.2	2.0859	1.90651	2.15257	2.16425	2.08673	2.42603	1.9337	Cuenca	MAE	MAPE	FAO-56	MAE	MAPE
July	236.26	270.711	227.35	278.143	279.701	194.856	315.345	249.87	July	34.4513	14.5819	July	8.91016	3.77134
August	227.87	260.307	216.221	270.321	271.727	185.608	303.215	242.815	August	32.4374	14.2351	August	11.6491	5.11219
September	162.03	186.868	163.027	193.869	194.889	157.092	217.666	174.146	September	24.8376	15.329	September	0.996707	0.615137
October	101.22	122.605	110.206	126.809	127.492	115.367	142.8	113.914	October	21.3847	21.1269	October	8.98594	8.87763
Total	727.38	840.491	716.803	869.142	873.808	652.923	979.026	780.745	Average	113.111	15.5505	Average	10.5767	1.45408
	Actual	Cuenca	FAO-56	Modified Snyder	Orang	Pereira	Snyder	Wahed Snyder
									Modified Snyder	MAE	MAPE	Orang	MAE	MAPE
									July	41.8829	17.7274	July	43.4406	18.3868
									August	42.4513	18.6296	August	43.8566	19.2463
									September	31.8389	19.65	September	32.8589	20.2795
									October	25.5893	25.2809	October	26.2722	25.9555
									Average	141.762	19.4895	Average	146.428	20.1309
									Snyder	MAE	MAPE	Wahed Snyder	MAE	MAPE
									July	79.0847	33.4736	July	13.61	5.7606
									August	75.3449	33.0649	August	14.9447	6.55843
Month	Actual	Cuenca	FAO-56	Modified Snyder	Orang	Snyder	Wahed & Snyder		September	55.6361	34.3369	September	12.1165	7.47794
July	236.26	270.711	227.35	278.143	279.701	315.345	249.87		October	41.5798	41.0786	October	12.6935	12.5405
August	227.87	260.307	216.221	270.321	271.727	303.215	242.815		Average	251.646	34.5962	Average	53.3647	7.33657
September	162.03	186.868	163.027	193.869	194.889	217.666	174.146
October	101.22	122.605	110.206	126.809	127.492	142.8	113.914
										Model	July	August	September	October	Total
										Actual	236.26	227.87	162.03	101.22	727.38
										Cuenca	270.711	260.307	186.868	122.605	840.491
										FAO-56	227.35	216.221	163.027	110.206	716.803
										Modified Snyder	278.143	270.321	193.869	126.809	869.142
										Orang	279.701	271.727	194.889	127.492	873.808
										Snyder	315.345	303.215	217.666	142.8	979.026
										Wahed Snyder	249.87	242.815	174.146	113.914	780.745
