# Supplementary material for: Estimation of reference evapotranspiration using some class-A pan evaporimeter pan coefficient estimation models in Mediterranean–Southeastern Anatolian transitional zone conditions of Turkey
Source: PeerJ. 2024 Jul 12;12:e17685. doi: 10.7717/peerj.17685 (PMC11249018; doi:10.7717/peerj.17685)
Supplement: Supplemental Information 5 [file peerj-12-17685-s005.xlsx]

## Sheet: Sayfa1
2021	Actual	Cuenca	FAO-56	Modified Snyder	Orang	Pereira	Snyder	Wahed Snyder
1-Jul	7.64784	8.86671	7.74437	9.2123	9.2596	7.40511	10.3067	8.27483
2-Jul	8.64362	10.575	8.6604	10.8577	10.9182	6.896	12.3063	9.75388
3-Jul	8.04324	7.93938	6.39395	8.09165	8.13954	4.84911	9.2582	7.26976
4-Jul	7.75486	7.95125	6.44559	8.1004	8.14855	4.96372	9.27367	7.27768
5-Jul	7.58206	7.80607	6.539	7.99837	8.04384	5.57764	9.08867	7.18552
6-Jul	7.29709	8.59287	7.22985	8.77986	8.83096	6.12736	10.0126	7.8879
7-Jul	8.86742	8.38898	6.78668	8.63708	8.68413	5.35239	9.75736	7.75874
8-Jul	8.38804	8.24431	6.97938	8.54175	8.58635	6.1386	9.58376	7.67267
9-Jul	8.20307	7.74909	6.55295	7.95919	8.00361	5.60368	9.01776	7.15012
10-Jul	9.19919	6.94372	5.53786	7.1653	7.20358	4.22829	8.0736	6.43641
11-Jul	7.78081	8.50285	7.12912	8.71657	8.76592	5.98811	9.8988	7.83068
12-Jul	8.92927	10.6191	8.50927	10.8873	10.9485	6.43607	12.3609	9.78059
13-Jul	9.20621	8.82276	7.30138	9.18158	9.22784	6.09363	10.254	8.24692
14-Jul	7.91222	8.81817	7.59077	9.18018	9.22654	7.0317	10.2496	8.24576
15-Jul	8.967	9.30643	7.66834	9.76298	9.80934	6.45615	10.8183	8.76839
16-Jul	8.28635	10.2115	8.69669	10.6159	10.6699	7.79002	11.869	9.5354
17-Jul	8.20377	9.06339	7.7396	9.34213	9.39291	6.82308	10.5414	8.39215
18-Jul	8.06493	8.29701	7.09426	8.57708	8.62268	6.33709	9.6469	7.70463
19-Jul	7.77404	8.24111	7.11729	8.54034	8.58496	6.56288	9.58034	7.67143
20-Jul	8.28457	8.23836	6.83529	8.5371	8.5815	5.7488	9.57628	7.66841
21-Jul	8.40166	10.7873	8.4487	11.0049	11.0693	6.07716	12.574	9.88689
22-Jul	8.53444	9.50193	7.31954	9.64826	9.70703	5.00996	11.0974	8.66861
23-Jul	8.72943	7.52629	6.20022	7.80861	7.84882	5.11527	8.74786	7.01394
24-Jul	7.98186	8.88356	7.44083	9.22172	9.26912	6.45033	10.3256	8.28323
25-Jul	7.68491	8.97854	7.66355	9.28518	9.33439	6.87616	10.4389	8.34066
26-Jul	6.80682	7.8772	6.88274	8.04953	8.09653	6.3604	9.1791	7.23186
27-Jul	7.73662	6.87425	5.84011	7.12087	7.15812	5.19139	7.99127	6.39637
28-Jul	8.74878	7.02362	5.87262	7.49423	7.52585	5.21992	8.1817	6.72975
29-Jul	9.05047	8.36568	6.99804	8.89597	8.93442	6.20016	9.73968	7.98874
30-Jul	8.39305	10.0621	8.48598	10.5191	10.5705	7.46749	11.6955	9.44791
31-Jul	9.32933	7.96716	6.54335	8.36198	8.40154	5.4451	9.26168	7.51007
1-Aug	9.6009	10.0737	8.20305	10.5248	10.5762	6.62365	11.7078	9.45298
2-Aug	8.50698	9.96475	8.45329	10.4577	10.5075	7.58253	11.5847	9.39243
3-Aug	8.3645	9.3451	7.95166	9.78888	9.83609	7.13937	10.8632	8.7919
4-Aug	8.4502	7.90981	6.75189	8.32761	8.36636	6.15532	9.19811	7.4791
5-Aug	8.97283	8.68684	7.2907	9.09497	9.13889	6.31476	10.0975	8.16865
6-Aug	7.30071	6.18962	5.37514	6.4112	6.44485	5.03463	7.19579	5.75896
7-Aug	6.72523	5.65842	4.89048	5.80465	5.83745	4.47686	6.58682	5.21472
8-Aug	6.01313	7.15108	6.31947	7.31095	7.35351	6.04818	8.332	6.56828
9-Aug	6.94959	5.63304	4.78929	5.78679	5.81906	4.20852	6.55513	5.19855
10-Aug	6.77449	7.63975	6.45222	7.88481	7.92719	5.64208	8.88395	7.08287
11-Aug	7.23362	6.83445	5.81894	7.09474	7.13128	5.24508	7.94417	6.37276
12-Aug	6.22044	8.94667	7.90593	9.26528	9.31407	7.8536	10.4015	8.32275
13-Aug	6.32798	9.4915	8.25821	9.64432	9.70343	7.41585	11.0845	8.66537
14-Aug	6.30615	8.50749	7.39786	8.72095	8.77055	6.86605	9.90511	7.83472
15-Aug	7.01132	8.27645	7.04893	8.56326	8.60846	6.30257	9.62219	7.69212
16-Aug	7.33269	8.92223	7.3836	9.24666	9.2947	6.19882	10.3711	8.30576
17-Aug	7.01442	9.78301	8.26755	10.0755	10.1306	7.19836	11.3794	9.05103
18-Aug	7.69422	6.41432	5.23364	6.56275	6.60039	4.1127	7.4706	5.89586
19-Aug	7.09364	9.3035	7.74164	9.50729	9.56249	6.32914	10.8399	8.54138
20-Aug	8.33884	9.64263	7.94683	9.98032	10.0326	6.54573	11.2093	8.96487
21-Aug	7.21231	7.30651	6.32225	7.66908	7.70561	6.02268	8.4948	6.8879
22-Aug	5.59704	6.00359	5.47388	6.2921	6.32259	5.98377	6.9801	5.65137
23-Aug	6.4679	7.33201	6.50874	7.68598	7.72306	6.61591	8.52426	6.90323
24-Aug	6.37895	5.74043	4.89108	5.86191	5.89624	4.23068	6.69028	5.26646
25-Aug	6.47148	6.61789	5.57278	6.71089	6.75267	4.5465	7.73622	6.02983
26-Aug	6.81672	7.77178	6.65234	7.97521	8.0201	5.86683	9.0461	7.16462
27-Aug	6.26594	7.0068	6.18391	7.21086	7.25068	5.96651	8.15189	6.4778
28-Aug	6.64975	6.92638	6.02691	7.15621	7.19449	5.63144	8.05401	6.42837
29-Aug	6.41183	6.44848	5.49429	6.5879	6.62634	4.75173	7.51442	5.91867
30-Aug	6.21569	7.25647	6.10144	7.38524	7.4297	5.06675	8.46748	6.63535
31-Aug	6.64265	6.50524	5.3947	6.62788	6.66734	4.3375	7.58728	5.95476
1-Sep	6.28533	7.16827	6.08279	7.32212	7.36488	5.22406	8.35352	6.5783
2-Sep	6.09935	5.81873	4.87553	5.918	5.95383	4.00551	6.79174	5.31714
3-Sep	8.13536	6.43882	5.15856	6.84375	6.87321	4.23635	7.49498	6.14572
4-Sep	6.33103	9.11807	7.84764	9.64793	9.69131	7.66398	10.6091	8.6645
5-Sep	6.33641	6.77731	5.82374	7.05781	7.09336	5.45272	7.87738	6.33939
6-Sep	6.13974	6.9126	5.94305	7.14668	7.18467	5.47231	8.03728	6.41973
7-Sep	6.0442	9.10703	7.83262	9.37201	9.42363	7.14183	10.5948	8.41917
8-Sep	5.38503	5.05124	4.32791	5.14955	5.18016	3.79565	5.89054	4.62658
9-Sep	6.32169	8.5833	7.11103	8.7726	8.82344	5.79757	10.0002	7.8813
10-Sep	6.41527	7.30259	5.80341	7.41762	7.4628	4.27589	8.52788	6.6645
11-Sep	6.17749	5.81534	4.67166	5.91469	5.95034	3.54485	6.78705	5.31408
12-Sep	6.70014	7.85486	6.36174	8.03158	8.07785	4.97984	9.14983	7.21547
13-Sep	5.15477	7.98578	6.70281	8.12638	8.17535	5.62103	9.31901	7.30124
14-Sep	5.86172	8.01107	6.61567	8.14441	8.19382	5.31531	9.35213	7.3175
15-Sep	4.52218	5.92797	5.16757	6.00001	6.03818	4.66813	6.93827	5.39134
16-Sep	4.38048	4.41454	3.89733	4.4765	4.50449	3.67707	5.16111	4.02226
17-Sep	5.08	4.18686	3.62152	4.31451	4.33804	3.42563	4.86993	3.8758
18-Sep	5.31352	6.88464	5.94768	7.12823	7.16573	5.6412	8.00391	6.40306
19-Sep	5.41441	5.57764	4.78033	5.7492	5.78046	4.38418	6.48724	5.16458
20-Sep	6.09803	6.89823	5.80486	7.13649	7.17414	5.09312	8.01973	6.41048
21-Sep	5.06931	4.95139	4.30978	5.07939	5.10811	4.06008	5.76386	4.56318
22-Sep	5.04995	7.24729	6.21592	7.37906	7.42341	5.51054	8.45563	6.6298
23-Sep	4.30917	2.97112	2.58069	3.00541	3.02464	2.32761	3.47891	2.70055
24-Sep	5.02003	3.4149	2.86543	3.54562	3.56382	2.60755	3.96921	3.18479
25-Sep	4.4757	4.11749	3.59485	4.26833	4.29061	3.59839	4.78664	3.83407
26-Sep	4.4874	4.04983	3.58006	4.2245	4.24559	3.70427	4.70751	3.79445
27-Sep	4.83578	4.09594	3.59631	4.25428	4.27618	3.6176	4.76124	3.82137
28-Sep	4.91951	6.33763	5.43753	6.51068	6.54702	4.97915	7.3752	5.84887
29-Sep	5.29527	5.00228	4.17536	5.11421	5.1438	3.53481	5.82759	4.5946
30-Sep	4.90276	7.0619	5.88492	7.24714	7.28779	5.02071	8.21922	6.51049
1-Oct	4.41697	7.00605	6.09649	7.20999	7.24975	5.83461	8.1508	6.47699
2-Oct	3.09431	3.56697	3.3313	3.64998	3.67117	3.6749	4.15535	3.27921
3-Oct	3.63914	4.13213	3.73168	4.27852	4.30113	3.95425	4.80433	3.84331
4-Oct	5.88855	5.19955	4.23019	5.50496	5.52939	3.70249	6.04938	4.94369
5-Oct	5.75744	5.1106	4.19743	5.45134	5.47432	3.79003	5.95267	4.89523
6-Oct	4.73373	5.18531	4.4203	5.49755	5.52189	4.332	6.03463	4.93707
7-Oct	4.12423	4.71619	4.12125	4.92283	4.94726	4.21238	5.48201	4.42165
8-Oct	2.4175	2.74568	2.62297	2.84676	2.86172	3.10215	3.19233	2.55718
9-Oct	2.96568	3.42215	3.17498	3.55169	3.57018	3.62024	3.97852	3.19035
10-Oct	3.09737	4.07659	3.76826	4.24242	4.26407	4.27368	4.73899	3.8107
11-Oct	2.85783	3.99704	3.74285	4.19169	4.21196	4.39096	4.64753	3.76484
12-Oct	3.6465	2.7447	2.45223	2.84561	2.86049	2.56539	3.19089	2.55611
13-Oct	2.60062	3.78322	3.44158	3.81118	3.83675	3.4055	4.44588	3.42492
14-Oct	2.94675	2.93625	2.67296	2.97951	2.99808	2.73955	3.4317	2.67717
15-Oct	2.97189	4.22587	3.85839	4.34188	4.36624	4.13696	4.91818	3.9006
16-Oct	4.49548	3.59128	2.97011	3.66581	3.68729	2.52179	4.18579	3.29342
17-Oct	3.50032	3.69193	3.14498	3.7399	3.76344	2.76042	4.31862	3.36043
18-Oct	3.27378	3.67345	3.20643	3.72632	3.74952	3.00019	4.29374	3.34817
19-Oct	3.13802	3.50179	3.11918	3.60445	3.62434	3.18737	4.07403	3.23802
20-Oct	3.53712	4.0761	3.55103	4.24122	4.26276	3.57277	4.73791	3.80956
21-Oct	3.0412	3.47028	3.08568	3.58314	3.60245	3.24344	4.03571	3.21875
22-Oct	2.59468	2.80398	2.54351	2.88545	2.90144	2.73312	3.26242	2.59214
23-Oct	2.01926	2.8791	2.71119	2.9381	2.95556	3.02614	3.35683	2.63975
24-Oct	2.07667	2.68369	2.52338	2.80653	2.82038	2.98603	3.12004	2.52081
25-Oct	2.29111	3.3952	3.13425	3.53407	3.55207	3.57632	3.94687	3.17442
26-Oct	2.10202	3.45249	3.2083	3.57173	3.59078	3.65875	4.01458	3.20848
27-Oct	2.48625	2.83231	2.56271	2.90491	2.92142	2.72229	3.29746	2.60973
28-Oct	2.938	2.81502	2.46824	2.89269	2.90884	2.44646	3.27586	2.59866
29-Oct	1.77033	3.86646	3.54844	3.87944	3.90689	3.48724	4.56868	3.48663
30-Oct	2.50396	3.04692	2.66965	3.06505	3.08592	2.44042	3.58619	2.75447
31-Oct	2.19928	2.29626	2.07719	2.30797	2.32389	2.00305	2.70586	2.07416	Cuenca	MAE	MAPE	FAO-56	MAE	MAPE
July	256.433	267.026	222.248	276.095	277.564	187.823	310.707	248.01	July	10.5928	4.13081	July	34.1852	13.3311
August	219.362	239.29	204.103	247.217	248.545	182.314	278.48	222.073	August	19.9278	9.08442	August	15.2595	6.95632
September	166.561	185.085	156.618	190.299	191.361	138.377	215.611	170.954	September	18.5237	11.1212	September	9.94269	5.9694
October	99.126	114.925	102.387	118.673	119.321	105.101	133.954	106.607	October	15.7986	15.9379	October	3.26116	3.28991
Total	741.482	806.325	685.356	832.283	836.791	613.615	938.751	747.644	Average	64.8428	8.74502	Average	56.1263	7.56948
	Actual	Cuenca	FAO-56	Modified Snyder	Orang	Pereira	Snyder	Wahed Snyder
									Modified Snyder	MAE	MAPE	Orang	MAE	MAPE
									July	19.6621	7.66754	July	21.1312	8.24044
									August	27.8546	12.698	August	29.1823	13.3033
									September	23.7376	14.2516	September	24.7996	14.8892
									October	19.5467	19.719	October	20.1954	20.3735
									Average	90.801	12.2459	Average	95.3086	12.8538
									Snyder	MAE	MAPE	Wahed Snyder	MAE	MAPE
									July	54.2737	21.1649	July	8.42306	3.2847
									August	59.1174	26.9497	August	2.71124	1.23596
Month	Actual	Cuenca	FAO-56	Modified Snyder	Orang	Snyder	Wahed Snyder		September	49.0496	29.4484	September	4.3933	2.63765
July	256.433	267.026	222.248	276.095	277.564	310.707	248.01		October	34.8278	35.1349	October	7.48066	7.54662
August	219.362	239.29	204.103	247.217	248.545	278.48	222.073		Average	197.268	26.6046	Average	6.16214	0.831057
September	166.561	185.085	156.618	190.299	191.361	215.611	170.954
October	99.126	114.925	102.387	118.673	119.321	133.954	106.607
		Model	July	August	September	October	Total
		Actual	256.433	219.362	166.561	99.126	741.482
		Cuenca	267.026	239.29	185.085	114.925	806.325
		FAO-56	222.248	204.103	156.618	102.387	685.356
		Modified Snyder	276.095	247.217	190.299	118.673	832.283
		Orang	277.564	248.545	191.361	119.321	836.791
		Snyder	310.707	278.48	215.611	133.954	938.751
		Wahed Snyder	248.01	222.073	170.954	106.607	747.644
