# Supplementary material for: Estimation of reference evapotranspiration using some class-A pan evaporimeter pan coefficient estimation models in Mediterranean–Southeastern Anatolian transitional zone conditions of Turkey
Source: PeerJ. 2024 Jul 12;12:e17685. doi: 10.7717/peerj.17685 (PMC11249018; doi:10.7717/peerj.17685)
Supplement: Supplemental Information 6 [file peerj-12-17685-s006.xlsx]

## Sheet: Sayfa1
2020	Actual	Cuenca	FAO-56	Modified Snyder	Orang	Pereira	Snyder	Wahed & Snyder									2021	Actual	Cuenca	FAO-56	Modified Snyder	Orang	Pereira	Snyder	Wahed & Snyder
1-Jul	0.596154	0.695016	0.562437	0.717007	0.720852	0.449015	0.808163	0.644075									1-Jul	0.588296	0.682055	0.595721	0.708639	0.712277	0.569624	0.792823	0.636526
2-Jul	0.537692	0.712526	0.618406	0.729234	0.733434	0.570648	0.829911	0.655143									2-Jul	0.576242	0.705	0.57736	0.723844	0.72788	0.459734	0.820422	0.650259
3-Jul	0.5725	0.676339	0.598684	0.704967	0.708508	0.603814	0.786171	0.633208									3-Jul	0.731204	0.721761	0.581268	0.735605	0.739958	0.440828	0.841654	0.660887
4-Jul	0.575455	0.664476	0.604655	0.697486	0.700828	0.664228	0.772627	0.62645									4-Jul	0.704987	0.722841	0.585962	0.7364	0.740777	0.451248	0.843061	0.661607
5-Jul	0.624615	0.688795	0.59014	0.713019	0.716772	0.535366	0.800773	0.640482									5-Jul	0.689278	0.709643	0.594455	0.727125	0.731258	0.507058	0.826243	0.653229
6-Jul	0.611538	0.703253	0.601464	0.722763	0.726782	0.535189	0.818316	0.64929									6-Jul	0.608091	0.716072	0.602488	0.731655	0.735913	0.510613	0.83438	0.657325
7-Jul	0.876667	0.752949	0.638498	0.759188	0.764201	0.520881	0.883922	0.682216									7-Jul	0.738951	0.699082	0.565557	0.719757	0.723678	0.446032	0.813113	0.646561
8-Jul	0.580833	0.731042	0.591227	0.742382	0.746922	0.449917	0.853838	0.667014									8-Jul	0.699003	0.687026	0.581615	0.711813	0.715529	0.51155	0.798647	0.639389
9-Jul	0.613333	0.699817	0.566124	0.720257	0.724191	0.447008	0.814013	0.647013									9-Jul	0.745734	0.704463	0.595723	0.723563	0.727601	0.509426	0.819797	0.650011
10-Jul	0.650833	0.704974	0.592707	0.723899	0.727944	0.507263	0.820423	0.650314									10-Jul	0.919919	0.694372	0.553786	0.71653	0.720358	0.422829	0.80736	0.643641
11-Jul	0.726364	0.719584	0.605471	0.734155	0.738482	0.509167	0.83888	0.659585									11-Jul	0.6484	0.708571	0.594094	0.726381	0.730494	0.499009	0.8249	0.652557
12-Jul	0.791	0.738933	0.600544	0.748287	0.75299	0.45585	0.864451	0.672353									12-Jul	0.595285	0.707942	0.567285	0.725819	0.729903	0.429071	0.824059	0.65204
13-Jul	0.550714	0.698704	0.564291	0.719495	0.723408	0.445495	0.812648	0.646324									13-Jul	0.70817	0.678674	0.561645	0.706276	0.709834	0.468741	0.788768	0.634379
14-Jul	0.696667	0.685159	0.564381	0.710499	0.714171	0.470437	0.796385	0.638196									14-Jul	0.608632	0.678321	0.583906	0.706168	0.709734	0.5409	0.788428	0.634289
15-Jul	0.5125	0.68221	0.571988	0.708619	0.712245	0.495217	0.792935	0.6365									15-Jul	0.6405	0.664745	0.547738	0.697356	0.700667	0.461154	0.772737	0.626314
16-Jul	0.834	0.725141	0.610796	0.738161	0.742597	0.510843	0.846088	0.663207									16-Jul	0.552423	0.680765	0.579779	0.707724	0.71133	0.519335	0.791267	0.635694
17-Jul	0.762	0.744292	0.615962	0.752407	0.757228	0.48183	0.871801	0.676081									17-Jul	0.631059	0.697184	0.595354	0.718626	0.722531	0.524852	0.810875	0.64555
18-Jul	0.639091	0.745418	0.599565	0.753212	0.758047	0.44073	0.873357	0.676803									18-Jul	0.672078	0.691417	0.591188	0.714757	0.718557	0.528091	0.803908	0.642052
19-Jul	0.529231	0.714015	0.589476	0.730151	0.734362	0.473969	0.831743	0.655962									19-Jul	0.647837	0.686759	0.593108	0.711695	0.715414	0.546906	0.798362	0.639286
20-Jul	0.65	0.72259	0.632086	0.736407	0.740806	0.583954	0.842796	0.661628									20-Jul	0.690381	0.68653	0.569607	0.711425	0.715125	0.479067	0.798024	0.639034
21-Jul	0.593333	0.731407	0.594125	0.742662	0.747211	0.452102	0.854326	0.667268									21-Jul	0.560111	0.719156	0.563246	0.733663	0.737955	0.405144	0.838264	0.659126
22-Jul	0.558125	0.680754	0.55983	0.707609	0.711201	0.464115	0.791191	0.635583									22-Jul	0.656495	0.730918	0.563042	0.742174	0.746694	0.385382	0.853646	0.666817
23-Jul	0.573333	0.683318	0.569109	0.709324	0.712967	0.48553	0.794229	0.637136									23-Jul	0.793584	0.684208	0.563656	0.709874	0.713529	0.465024	0.79526	0.637631
24-Jul	0.603077	0.692015	0.595467	0.715174	0.718987	0.544423	0.804636	0.642431									24-Jul	0.613989	0.683351	0.572372	0.709363	0.713009	0.496179	0.794278	0.637172
25-Jul	0.634615	0.737922	0.614643	0.74758	0.752271	0.489633	0.863086	0.671719									25-Jul	0.591147	0.690657	0.589504	0.714245	0.71803	0.528935	0.802993	0.641589
26-Jul	0.509286	0.710305	0.572097	0.72748	0.731611	0.437204	0.827029	0.653542									26-Jul	0.618802	0.716109	0.625704	0.731776	0.736048	0.578218	0.834463	0.657442
27-Jul	0.608182	0.704315	0.619364	0.723565	0.727614	0.591236	0.819662	0.65002									27-Jul	0.773662	0.687425	0.584011	0.712087	0.715812	0.519139	0.799127	0.639637
28-Jul	0.545	0.689771	0.616413	0.71378	0.717565	0.625839	0.802	0.641177									28-Jul	0.795343	0.638511	0.533875	0.681294	0.684168	0.474538	0.743791	0.611796
29-Jul	0.562	0.696976	0.613088	0.718565	0.722477	0.591047	0.810662	0.6455									29-Jul	0.69619	0.643514	0.538311	0.684306	0.687263	0.476935	0.749206	0.614519
30-Jul	0.577143	0.681847	0.573718	0.708393	0.712014	0.500127	0.792515	0.636296									30-Jul	0.559537	0.670805	0.565732	0.701274	0.7047	0.497833	0.779698	0.629861
31-Jul	0.65	0.688431	0.572073	0.712687	0.716422	0.483704	0.800289	0.640175									31-Jul	0.777444	0.66393	0.545279	0.696832	0.700128	0.453758	0.771807	0.625839
1-Aug	0.685	0.682868	0.562153	0.708993	0.712624	0.468869	0.793677	0.636834									1-Aug	0.64006	0.671581	0.54687	0.701656	0.705082	0.441577	0.780518	0.630199
2-Aug	0.586429	0.689894	0.568998	0.713636	0.717395	0.471366	0.802025	0.641032									2-Aug	0.567132	0.664317	0.563553	0.697182	0.700497	0.505502	0.772314	0.626162
3-Aug	0.718182	0.682926	0.567819	0.709062	0.712697	0.485227	0.793764	0.636898									3-Aug	0.597464	0.667507	0.567976	0.699206	0.702578	0.509955	0.775944	0.627993
4-Aug	0.529333	0.707841	0.592443	0.725869	0.729967	0.501724	0.823985	0.652094									4-Aug	0.704184	0.659151	0.562658	0.693968	0.697197	0.512944	0.766509	0.623258
5-Aug	0.645	0.723499	0.583191	0.736861	0.741249	0.443601	0.843912	0.662023									5-Aug	0.690218	0.668219	0.560823	0.699613	0.702992	0.485751	0.776728	0.628358
6-Aug	0.6425	0.715736	0.569198	0.731268	0.735499	0.4239	0.833895	0.656964									6-Aug	0.81119	0.687736	0.597237	0.712356	0.716094	0.559404	0.799532	0.639885
7-Aug	0.577143	0.689192	0.555389	0.713099	0.716836	0.436604	0.801147	0.640542									7-Aug	0.840654	0.707303	0.61131	0.725582	0.729681	0.559607	0.823352	0.65184
8-Aug	0.759091	0.723446	0.594973	0.736874	0.741268	0.47363	0.84386	0.662039									8-Aug	0.601313	0.715108	0.631947	0.731095	0.735351	0.604818	0.8332	0.656828
9-Aug	0.626667	0.743888	0.607781	0.75207	0.756878	0.464016	0.871242	0.675774									9-Aug	0.868699	0.70413	0.598662	0.723349	0.727383	0.526065	0.819392	0.649819
10-Aug	0.614545	0.749088	0.599062	0.756045	0.760956	0.435337	0.878479	0.679363									10-Aug	0.615863	0.694523	0.586565	0.716801	0.720653	0.512916	0.807631	0.643898
11-Aug	0.611818	0.733052	0.575274	0.7438	0.74837	0.411978	0.856504	0.66829									11-Aug	0.723362	0.683445	0.581894	0.709474	0.713128	0.524508	0.794417	0.637276
12-Aug	0.635455	0.691729	0.566486	0.714838	0.718627	0.464892	0.804215	0.642117									12-Aug	0.478495	0.688206	0.608148	0.712714	0.716467	0.604123	0.800117	0.640212
13-Aug	0.631538	0.681578	0.547859	0.708075	0.711673	0.433978	0.792117	0.635999									13-Aug	0.486768	0.730115	0.635247	0.741871	0.746418	0.57045	0.852651	0.666567
14-Aug	0.589286	0.630964	0.531344	0.67683	0.679584	0.488691	0.735736	0.607761									14-Aug	0.525512	0.708957	0.616489	0.726746	0.730879	0.572171	0.825426	0.652894
15-Aug	0.554667	0.63746	0.532686	0.680663	0.68352	0.478213	0.742659	0.611225									15-Aug	0.584277	0.689704	0.587411	0.713605	0.717372	0.525215	0.801849	0.64101
16-Aug	0.518	0.650806	0.552529	0.688795	0.69188	0.515377	0.757224	0.61858									16-Aug	0.564053	0.686325	0.567969	0.711282	0.714977	0.476832	0.797776	0.638904
17-Aug	0.588571	0.665503	0.545022	0.697814	0.701136	0.460934	0.773584	0.626727									17-Aug	0.50103	0.698786	0.590539	0.719682	0.723613	0.514169	0.812814	0.646502
18-Aug	0.618462	0.684753	0.561645	0.710219	0.713882	0.467065	0.795897	0.637942									18-Aug	0.854914	0.712702	0.581516	0.729195	0.733377	0.456966	0.830067	0.655095
19-Aug	0.645833	0.703296	0.569315	0.722638	0.726638	0.449454	0.818296	0.649166									19-Aug	0.545665	0.715654	0.595511	0.73133	0.735576	0.486857	0.833836	0.657029
20-Aug	0.702727	0.730936	0.580895	0.742262	0.746794	0.426548	0.853688	0.666902									20-Aug	0.595632	0.68876	0.567631	0.71288	0.716618	0.467552	0.800667	0.640348
21-Aug	0.588333	0.737575	0.596231	0.747251	0.751924	0.448077	0.862605	0.671416									21-Aug	0.655665	0.664228	0.57475	0.697189	0.70051	0.547516	0.772254	0.626173
22-Aug	0.534615	0.653729	0.523828	0.690393	0.693505	0.427117	0.76032	0.620013									22-Aug	0.621893	0.667066	0.608209	0.699123	0.70251	0.664864	0.775567	0.62793
23-Aug	0.502	0.634067	0.52741	0.678624	0.681423	0.472627	0.73901	0.609381									23-Aug	0.587991	0.666547	0.591704	0.698726	0.702096	0.601447	0.774932	0.627567
24-Aug	0.519231	0.624515	0.542054	0.67315	0.675811	0.544812	0.729006	0.60444									24-Aug	0.797369	0.717554	0.611385	0.732739	0.73703	0.528835	0.836285	0.658308
25-Aug	0.589	0.660592	0.5897	0.695003	0.698272	0.622977	0.768216	0.624202									25-Aug	0.719053	0.735321	0.619198	0.745655	0.750296	0.505167	0.85958	0.669981
26-Aug	0.609091	0.673109	0.583014	0.702829	0.706305	0.558226	0.782398	0.631272									26-Aug	0.619702	0.706526	0.604758	0.725019	0.7291	0.533348	0.822373	0.65133
27-Aug	0.709	0.715896	0.602338	0.73153	0.735785	0.509048	0.834155	0.657212									27-Aug	0.626594	0.70068	0.618391	0.721086	0.725068	0.596651	0.815189	0.64778
28-Aug	0.588182	0.693592	0.585816	0.716176	0.720011	0.509708	0.806506	0.643333									28-Aug	0.664975	0.692638	0.602691	0.715621	0.719449	0.563144	0.805401	0.642837
29-Aug	0.551818	0.682876	0.602825	0.709205	0.712861	0.597685	0.793806	0.637039									29-Aug	0.712426	0.716498	0.610476	0.731989	0.73626	0.52797	0.834935	0.65763
30-Aug	0.541	0.631942	0.58081	0.677688	0.680489	0.66858	0.736983	0.608553									30-Aug	0.621569	0.725647	0.610144	0.738524	0.74297	0.506675	0.846748	0.663535
31-Aug	0.499091	0.662059	0.604867	0.695979	0.69928	0.668816	0.769904	0.625088									31-Aug	0.738072	0.722804	0.599411	0.736431	0.740816	0.481944	0.843031	0.66164
1-Sep	0.639	0.670289	0.594098	0.701095	0.70453	0.603462	0.7792	0.629708									1-Sep	0.628533	0.716827	0.608279	0.732212	0.736488	0.522406	0.835352	0.65783
2-Sep	0.616667	0.66699	0.597934	0.699033	0.702414	0.627748	0.775454	0.627846									2-Sep	0.762419	0.727341	0.609442	0.73975	0.744228	0.500689	0.848968	0.664642
3-Sep	0.415556	0.654259	0.601201	0.69115	0.69432	0.678008	0.761201	0.620723									3-Sep	0.813536	0.643882	0.515856	0.684375	0.687321	0.423635	0.749498	0.614572
4-Sep	0.56	0.639647	0.591186	0.682287	0.685215	0.68315	0.745241	0.612711									4-Sep	0.452217	0.651291	0.560546	0.689138	0.692236	0.547427	0.757791	0.618893
5-Sep	0.569091	0.647563	0.575405	0.686961	0.690008	0.600835	0.753764	0.616931									5-Sep	0.633641	0.677731	0.582374	0.705781	0.709336	0.545272	0.787738	0.633939
6-Sep	0.583636	0.672535	0.583919	0.702469	0.705936	0.563492	0.781742	0.630947									6-Sep	0.613974	0.69126	0.594305	0.714668	0.718467	0.547231	0.803728	0.641973
7-Sep	0.687778	0.691491	0.599195	0.714844	0.71865	0.561531	0.804017	0.642134									7-Sep	0.464938	0.700541	0.602509	0.720924	0.724894	0.549371	0.814986	0.647629
8-Sep	0.655556	0.685302	0.598653	0.710767	0.714463	0.577619	0.796652	0.638449									8-Sep	0.76929	0.721606	0.618273	0.73565	0.740023	0.542236	0.841506	0.66094
9-Sep	0.503571	0.614304	0.530836	0.667224	0.669721	0.522789	0.718367	0.599082									9-Sep	0.526808	0.715275	0.592586	0.73105	0.735287	0.483131	0.833349	0.656775
10-Sep	0.427857	0.640482	0.56528	0.68266	0.685587	0.584977	0.74605	0.613041									10-Sep	0.641527	0.730259	0.580341	0.741762	0.74628	0.427589	0.852788	0.66645
11-Sep	0.743333	0.659548	0.611502	0.694445	0.697707	0.703654	0.767107	0.623703									11-Sep	0.772187	0.726917	0.583957	0.739337	0.743792	0.443106	0.848382	0.66426
12-Sep	0.54	0.6859	0.627374	0.711275	0.714996	0.679218	0.797426	0.638916									12-Sep	0.609103	0.714078	0.57834	0.730144	0.73435	0.452713	0.831803	0.655952
13-Sep	0.625556	0.631868	0.55861	0.677532	0.680319	0.585029	0.736821	0.608405									13-Sep	0.468615	0.72598	0.609346	0.738762	0.743214	0.511003	0.847183	0.663749
14-Sep	0.655556	0.711453	0.598072	0.728399	0.732568	0.508338	0.828523	0.654382									14-Sep	0.532883	0.728279	0.601425	0.740401	0.744893	0.48321	0.850193	0.665228
15-Sep	0.682857	0.713391	0.637648	0.729911	0.734138	0.633262	0.831033	0.65576									15-Sep	0.565272	0.740996	0.645946	0.750002	0.754772	0.583517	0.867283	0.673917
16-Sep	0.486	0.696713	0.626391	0.718441	0.722355	0.644426	0.81037	0.645392									16-Sep	0.73008	0.735756	0.649555	0.746083	0.750749	0.612845	0.860185	0.670377
17-Sep	0.608889	0.720038	0.637011	0.734601	0.738953	0.607624	0.839507	0.659998									17-Sep	0.846666	0.69781	0.603587	0.719085	0.723007	0.570938	0.811656	0.645967
18-Sep	0.72	0.72325	0.609977	0.736795	0.741194	0.513794	0.843624	0.661972									18-Sep	0.531352	0.688464	0.594768	0.712823	0.716573	0.56412	0.800391	0.640306
19-Sep	0.74625	0.703697	0.591136	0.723018	0.727039	0.505253	0.81884	0.649517									19-Sep	0.676801	0.697205	0.597541	0.71865	0.722557	0.548022	0.810906	0.645572
20-Sep	0.569	0.715465	0.612372	0.731269	0.735521	0.544774	0.833623	0.65698									20-Sep	0.609803	0.689823	0.580486	0.713649	0.717414	0.509312	0.801973	0.641048
21-Sep	0.61	0.716257	0.622546	0.731868	0.736141	0.580498	0.834647	0.657524									21-Sep	0.724187	0.707341	0.615683	0.725627	0.729729	0.580011	0.823408	0.651882
22-Sep	0.635	0.715938	0.648908	0.731736	0.736016	0.6663	0.834277	0.657412									22-Sep	0.504995	0.724729	0.621592	0.737906	0.742341	0.551054	0.845563	0.66298
23-Sep	0.606667	0.72374	0.607413	0.737137	0.741544	0.510073	0.844258	0.66228									23-Sep	1.07729	0.742781	0.645172	0.751353	0.756159	0.581903	0.869728	0.675138
24-Sep	0.67625	0.727315	0.606722	0.73972	0.744196	0.499408	0.84893	0.664614									24-Sep	1.00401	0.682979	0.573087	0.709125	0.712765	0.52151	0.793843	0.636957
25-Sep	0.588889	0.742245	0.622088	0.750869	0.755652	0.507995	0.868985	0.674694									25-Sep	0.74595	0.686249	0.599142	0.711389	0.715102	0.599732	0.797773	0.639012
26-Sep	0.634286	0.726518	0.612266	0.739164	0.743628	0.521752	0.847891	0.664114									26-Sep	0.747901	0.674971	0.596676	0.704083	0.707599	0.617379	0.784585	0.632409
27-Sep	0.63375	0.717976	0.600892	0.732994	0.737287	0.503997	0.83681	0.658535									27-Sep	0.805963	0.682657	0.599385	0.709047	0.712697	0.602934	0.79354	0.636895
28-Sep	0.512	0.70537	0.596473	0.724188	0.728243	0.518803	0.820922	0.650576									28-Sep	0.546612	0.704182	0.60417	0.723409	0.727447	0.553238	0.819467	0.649875
29-Sep	0.56625	0.689941	0.61429	0.713884	0.717671	0.62235	0.802199	0.641271									29-Sep	0.756467	0.714611	0.59648	0.730601	0.734828	0.504972	0.832512	0.656371
30-Sep	0.663333	0.703922	0.595809	0.723194	0.727222	0.527147	0.819129	0.649678									30-Sep	0.490276	0.70619	0.588492	0.724714	0.728779	0.502071	0.821922	0.651049
1-Oct	0.564286	0.745223	0.646873	0.753222	0.758079	0.579759	0.873096	0.676827									1-Oct	0.441697	0.700605	0.609649	0.720999	0.724975	0.583461	0.81508	0.647699
2-Oct	0.613333	0.741206	0.651486	0.750178	0.754955	0.608512	0.867572	0.674078									2-Oct	0.618862	0.713395	0.66626	0.729996	0.734234	0.73498	0.831071	0.655843
3-Oct	0.54125	0.692748	0.59443	0.715656	0.719481	0.554925	0.805513	0.642866									3-Oct	0.606523	0.688688	0.621947	0.713087	0.716855	0.659042	0.800722	0.640552
4-Oct	0.793333	0.667615	0.579246	0.699335	0.702716	0.572288	0.776106	0.628113									4-Oct	0.736069	0.649944	0.528774	0.68812	0.691174	0.462811	0.756173	0.617961
5-Oct	0.52	0.646464	0.566798	0.686252	0.689276	0.582115	0.752533	0.616287									5-Oct	0.71968	0.638825	0.524679	0.681418	0.68429	0.473754	0.744083	0.611904
6-Oct	0.542857	0.644588	0.588128	0.68523	0.688236	0.669853	0.750569	0.61537									6-Oct	0.591716	0.648164	0.552537	0.687194	0.690236	0.5415	0.754329	0.617134
7-Oct	0.47625	0.660469	0.59966	0.694971	0.698243	0.66484	0.768108	0.624176									7-Oct	0.589176	0.673742	0.58875	0.703261	0.706751	0.601768	0.783145	0.631664
8-Oct	0.74	0.669608	0.607071	0.700721	0.704151	0.671229	0.778458	0.629374									8-Oct	0.604374	0.68642	0.655744	0.71169	0.71543	0.775537	0.798082	0.639296
9-Oct	0.458571	0.662136	0.610708	0.696049	0.699354	0.704536	0.770006	0.625153									9-Oct	0.593136	0.684431	0.634995	0.710338	0.714036	0.724047	0.795705	0.638071
10-Oct	0.49875	0.663146	0.586351	0.696574	0.699884	0.616045	0.771074	0.625621									10-Oct	0.516228	0.679431	0.628043	0.70707	0.710678	0.712279	0.789832	0.635116
11-Oct	0.554286	0.679599	0.598357	0.707062	0.710659	0.611682	0.789959	0.635101									11-Oct	0.476305	0.666173	0.623808	0.698615	0.701993	0.731827	0.774588	0.627474
12-Oct	0.7275	0.693681	0.643981	0.716469	0.720335	0.723921	0.806737	0.643614									12-Oct	0.911626	0.686176	0.613058	0.711402	0.715121	0.641348	0.797721	0.639027
13-Oct	0.715	0.689562	0.641796	0.713728	0.71752	0.727827	0.801798	0.641136									13-Oct	0.520124	0.756643	0.688316	0.762236	0.767351	0.681099	0.889177	0.684984
14-Oct	0.716	0.714449	0.637581	0.730652	0.734898	0.637775	0.832371	0.656429									14-Oct	0.736687	0.734062	0.668239	0.744879	0.749519	0.684889	0.857924	0.669294
15-Oct	0.624286	0.721648	0.622901	0.735698	0.740074	0.568491	0.841566	0.660985									15-Oct	0.495314	0.704311	0.643065	0.723647	0.727707	0.689493	0.819697	0.6501
16-Oct	0.592857	0.721045	0.613572	0.73523	0.739589	0.539793	0.840774	0.660559									16-Oct	0.899096	0.718257	0.594022	0.733163	0.737457	0.504358	0.837159	0.658685
17-Oct	0.712	0.718106	0.634628	0.73322	0.737534	0.61898	0.837025	0.658749									17-Oct	0.700064	0.738386	0.628997	0.74798	0.752688	0.552084	0.863724	0.672085
18-Oct	0.53	0.714316	0.643375	0.730578	0.734825	0.663529	0.83221	0.656364									18-Oct	0.654756	0.73469	0.641287	0.745264	0.749905	0.600037	0.858748	0.669635
19-Oct	0.7125	0.7366	0.674383	0.746781	0.751475	0.695663	0.861333	0.671014									19-Oct	0.627604	0.700359	0.623836	0.72089	0.724869	0.637474	0.814806	0.647604
20-Oct	0.545	0.736093	0.650198	0.746336	0.751009	0.620872	0.860639	0.670606									20-Oct	0.58952	0.679351	0.591839	0.706871	0.71046	0.595462	0.789651	0.634927
21-Oct	0.534	0.713996	0.683033	0.730449	0.734703	0.778075	0.831844	0.656255									21-Oct	0.608241	0.694057	0.617137	0.716628	0.720489	0.648688	0.807141	0.643751
22-Oct	0.468	0.709291	0.664601	0.727133	0.731293	0.743624	0.825911	0.653255									22-Oct	0.64867	0.700994	0.635878	0.721364	0.72536	0.683281	0.815605	0.648036
23-Oct	0.548	0.722294	0.661976	0.73629	0.740697	0.70054	0.842444	0.66153									23-Oct	0.504814	0.719775	0.677798	0.734526	0.738889	0.756536	0.839208	0.659939
24-Oct	0.46	0.6814	0.638203	0.708374	0.71202	0.740105	0.79215	0.636297									24-Oct	0.519167	0.670924	0.630844	0.701633	0.705095	0.746508	0.780011	0.630203
25-Oct	0.46	0.658597	0.621113	0.693886	0.697136	0.745578	0.766065	0.6232									25-Oct	0.458221	0.67904	0.626851	0.706814	0.710415	0.715263	0.789374	0.634885
26-Oct	0.575	0.681585	0.636842	0.70849	0.712139	0.737995	0.792363	0.636401									26-Oct	0.420404	0.690498	0.641659	0.714347	0.718155	0.73175	0.802916	0.641695
27-Oct	0.46	0.676752	0.630763	0.705353	0.708915	0.731461	0.786723	0.633565									27-Oct	0.621563	0.708076	0.640677	0.726227	0.730356	0.680572	0.824365	0.652431
28-Oct	0.7025	0.657651	0.597058	0.693218	0.696442	0.670719	0.764954	0.622591									28-Oct	0.7345	0.703754	0.617059	0.723172	0.727209	0.611616	0.818965	0.649664
29-Oct	0.383333	0.697433	0.624287	0.718917	0.722843	0.65232	0.81124	0.645821									29-Oct	0.354065	0.773293	0.709688	0.775888	0.781378	0.697448	0.913736	0.697326
30-Oct	0.61	0.712814	0.657074	0.729567	0.733791	0.717295	0.830328	0.655453									30-Oct	0.625991	0.76173	0.667413	0.766264	0.77148	0.610106	0.896548	0.688619
31-Oct	0.733333	0.695299	0.635502	0.717525	0.721417	0.695577	0.808676	0.644566									31-Oct	0.733093	0.765421	0.692396	0.769322	0.774629	0.667684	0.901953	0.691388
July	0.624041	0.706526	0.594156	0.725432	0.72952	0.510186	0.823189	0.6517									July	0.672025	0.691994	0.576205	0.715421	0.719231	0.487328	0.805205	0.642647
August	0.6036	0.686723	0.571063	0.712501	0.71623	0.491261	0.799962	0.640007									August	0.65038	0.695411	0.593906	0.717796	0.721679	0.53145	0.809388	0.644799
September	0.605419	0.690447	0.602507	0.714964	0.718774	0.579577	0.80422	0.642243									September	0.668443	0.704934	0.598311	0.724383	0.728444	0.532753	0.821267	0.650753
October	0.584265	0.694368	0.627161	0.717521	0.721409	0.662772	0.808714	0.64456									October	0.6083	0.7016	0.628556	0.722719	0.726748	0.649571	0.818105	0.649258
Month	Actual	Cuenca	FAO-56	Modified Snyder	Orang	Pereira	Snyder	Wahed Snyder									Month	Actual	Cuenca	FAO-56	Modified Snyder	Orang	Pereira	Snyder	Wahed Snyder
July	0.624041	0.706526	0.594156	0.725432	0.72952	0.510186	0.823189	0.6517									July	0.672025	0.691994	0.576205	0.715421	0.719231	0.487328	0.805205	0.642647
August	0.6036	0.686723	0.571063	0.712501	0.71623	0.491261	0.799962	0.640007									August	0.65038	0.695411	0.593906	0.717796	0.721679	0.53145	0.809388	0.644799
September	0.605419	0.690447	0.602507	0.714964	0.718774	0.579577	0.80422	0.642243									September	0.668443	0.704934	0.598311	0.724383	0.728444	0.532753	0.821267	0.650753
October	0.584265	0.694368	0.627161	0.717521	0.721409	0.662772	0.808714	0.64456									October	0.6083	0.7016	0.628556	0.722719	0.726748	0.649571	0.818105	0.649258
