# Supplementary material for: Estimation of reference evapotranspiration using some class-A pan evaporimeter pan coefficient estimation models in Mediterranean–Southeastern Anatolian transitional zone conditions of Turkey
Source: PeerJ. 2024 Jul 12;12:e17685. doi: 10.7717/peerj.17685 (PMC11249018; doi:10.7717/peerj.17685)
Supplement: Supplemental Information 7 [file peerj-12-17685-s007.xlsx]

## Sheet: Sayfa1
Date	U2	2020	2021		Rs	Date	2020	2021
1-Jul		3.54	1.85			1-Jul	30.2256	27.2523
2-Jul		1.95	3.25			2-Jul	27.9342	28.5205
3-Jul		1.59	3.63			3-Jul	28.8936	29.0741
4-Jul		1.11	3.48			4-Jul	27.7452	29.0618
5-Jul		2.25	2.73			5-Jul	29.1618	29.1161
6-Jul		2.27	2.63			6-Jul	28.197	28.5081
7-Jul		2.52	3.54			7-Jul	28.2096	29.1264
8-Jul		3.54	2.52			8-Jul	28.359	27.8122
9-Jul		3.54	2.52			9-Jul	28.3194	27.2865
10-Jul		2.65	3.88			10-Jul	27.9054	28.9053
11-Jul		2.63	2.71			11-Jul	27.8928	27.8373
12-Jul		3.44	3.75			12-Jul	28.4418	28.4187
13-Jul		3.58	3.06			13-Jul	29.1636	27.7654
14-Jul		3.15	2.17			14-Jul	29.2266	27.2556
15-Jul		2.75	3.21			15-Jul	29.034	28.2346
16-Jul		2.61	2.4			16-Jul	28.6272	27.0955
17-Jul		3.04	2.31			17-Jul	27.8658	26.4707
18-Jul		3.69	2.29			18-Jul	27.9846	26.6633
19-Jul		3.06	2.08			19-Jul	28.0314	26.4599
20-Jul		1.79	2.98			20-Jul	28.242	27.7397
21-Jul		3.44	4.27			21-Jul	29.151	28.5213
22-Jul		3.2	4.65			22-Jul	27.6966	28.3991
23-Jul		2.9	3.15			23-Jul	29.0412	27.3941
24-Jul		2.15	2.77			24-Jul	27.6516	27.5247
25-Jul		2.88	2.33			25-Jul	27.0792	26.7284
26-Jul		3.63	1.81			26-Jul	26.5824	25.9976
27-Jul		1.68	2.44			27-Jul	26.6814	26.6188
28-Jul		1.38	3			28-Jul	25.0452	27.2805
29-Jul		1.68	2.96			29-Jul	26	27.0527
30-Jul		2.67	2.65			30-Jul	27.0108	26.1423
31-Jul		2.94	3.29			31-Jul	27.8658	26.7822
1-Aug		3.17	3.46			1-Aug	27.981	26.5828
2-Aug		3.11	2.54			2-Aug	27.54	25.7406
3-Aug		2.94	2.46			3-Aug	26.3448	25.2459
4-Aug		2.75	2.42			4-Aug	27.6714	25.1543
5-Aug		3.61	2.77			5-Aug	27.09	25.3111
6-Aug		3.92	1.96			6-Aug	26.5122	24.9273
7-Aug		3.65	2.04			7-Aug	27.3186	25.6272
8-Aug		3.15	1.58			8-Aug	27.333	24.8631
9-Aug		3.33	2.4			9-Aug	26.8578	25.5313
10-Aug		3.83	2.56			10-Aug	26.3988	22.2
11-Aug		4.23	2.4			11-Aug	25.5672	25.3667
12-Aug		3.27	1.6			12-Aug	25.3728	24.9313
13-Aug		3.73	1.91			13-Aug	26.5554	24.3347
14-Aug		2.88	1.91			14-Aug	26.5248	24.6866
15-Aug		3.02	2.38			15-Aug	26.5176	24.6656
16-Aug		2.58	3.04			16-Aug	26.9766	21.4
17-Aug		3.35	2.54			17-Aug	26.6004	24.6643
18-Aug		3.25	3.33			18-Aug	26.46	24.8769
19-Aug		3.52	2.88			19-Aug	26.0082	24.2863
20-Aug		3.94	3.13			20-Aug	25.8858	24.4596
21-Aug		3.56	2.1			21-Aug	24.9354	23.6287
22-Aug		3.92	1.07			22-Aug	22.4946	22.9137
23-Aug		3.15	1.56			23-Aug	25.2558	22.7141
24-Aug		2.23	2.35			24-Aug	25.0182	23.1905
25-Aug		1.47	2.63			25-Aug	24.9426	22.9283
26-Aug		2.05	2.25			26-Aug	24.1884	22.4435
27-Aug		2.63	1.61			27-Aug	23.5656	21.8747
28-Aug		2.56	1.91			28-Aug	22.3182	21.7617
29-Aug		1.63	2.35			29-Aug	22.5234	22.3489
30-Aug		1.06	2.65			30-Aug	23.2416	22.6562
31-Aug		1.05	2.96			31-Aug	23.9994	22.5748
1-Sep		1.58	2.44			1-Sep	22.9842	22.2443
2-Sep		1.37	2.73			2-Sep	20.5236	22.304
3-Sep		0.98	3.98			3-Sep	20.88	24.3497
4-Sep		0.94	2.27			4-Sep	21.6828	23.5147
5-Sep		1.61	2.21			5-Sep	21.438	22.2485
6-Sep		2	2.17			6-Sep	22.1274	21.712
7-Sep		2	2.15			7-Sep	22.1904	21.4546
8-Sep		1.84	2.23			8-Sep	21.8682	17.3
9-Sep		2.4	2.98			9-Sep	22.5018	21.5585
10-Sep		1.78	3.94			10-Sep	22.9122	22.2925
11-Sep		0.83	3.69			11-Sep	21.4182	22.121
12-Sep		0.98	3.5			12-Sep	16.866	21.81
13-Sep		1.79	2.69			13-Sep	18.6822	18.6
14-Sep		2.65	3.06			14-Sep	20.2608	21.1468
15-Sep		1.36	1.89			15-Sep	20.9988	20.3785
16-Sep		1.26	1.62			16-Sep	20.7972	20.264
17-Sep		1.56	2.03			17-Sep	20.7936	20.7518
18-Sep		2.58	2.07			18-Sep	20.0196	20.409
19-Sep		2.67	2.23			19-Sep	20.1492	20.0699
20-Sep		2.25	2.65			20-Sep	19.5606	19.873
21-Sep		1.92	1.89			21-Sep	15.0822	19.3785
22-Sep		1.11	2.21			22-Sep	19.6902	19.2898
23-Sep		2.69	1.97			23-Sep	19.6452	19.5338
24-Sep		2.83	2.73			24-Sep	18.6876	20.9238
25-Sep		2.75	1.85			25-Sep	19.197	20.3545
26-Sep		2.6	1.62			26-Sep	15.2028	19.6479
27-Sep		2.75	1.74			27-Sep	19.1016	19.2633
28-Sep		2.52	2.2			28-Sep	18.5922	18.5665
29-Sep		1.45	2.81			29-Sep	18.009	18.7817
30-Sep		2.5	2.85			30-Sep	18.648	14.1
1-Oct		1.99	1.9			1-Oct	14.238	17.9728
2-Oct		1.72	0.66			2-Oct	17.712	16.8966
3-Oct		2.21	1.19			3-Oct	18.7578	16.9584
4-Oct		2.03	3.58			4-Oct	18.342	19.8141
5-Oct		1.89	3.42			5-Oct	18.6732	19.7274
6-Oct		1.13	2.5			6-Oct	18.6012	19.0124
7-Oct		1.16	1.86			7-Oct	17.7066	18.4371
8-Oct		1.16	0.43			8-Oct	17.1342	16.8839
9-Oct		0.9	0.77			9-Oct	17.2062	16.8211
10-Oct		1.65	0.83			10-Oct	17.1072	16.2694
11-Oct		1.69	0.68			11-Oct	15.5142	15.8032
12-Oct		0.75	1.39			12-Oct	16.4664	16.1929
13-Oct		0.72	1.11			13-Oct	16.587	15.5956
14-Oct		1.39	1.05			14-Oct	15.0264	15.2733
15-Oct		2.07	0.99			15-Oct	16.1928	15.0473
16-Oct		2.38	3.02			16-Oct	15.849	16.8547
17-Oct		1.58	2.38			17-Oct	15.51	15.9239
18-Oct		1.22	1.85			18-Oct	15.26	15.4858
19-Oct		0.96	1.43			19-Oct	15.35	14.8852
20-Oct		1.61	1.91			20-Oct	14.74	15.9698
21-Oct		0.4	1.47			21-Oct	15.17	16.0689
22-Oct		0.62	1.1			22-Oct	14.6	14.8637
23-Oct		0.93	0.56			23-Oct	14.66	14.1135
24-Oct		0.65	0.62			24-Oct	14.05	14.3956
25-Oct		0.61	0.85			25-Oct	14.6	14.4473
26-Oct		0.68	0.74			26-Oct	14.42	12.2
27-Oct		0.72	1.14			27-Oct	13.94	14.2086
28-Oct		1.17	1.74			28-Oct	13.23	14.2179
29-Oct		1.34	1.02			29-Oct	10.51	10.4
30-Oct		0.84	1.85			30-Oct	13.26	13.9351
31-Oct		0.98	1.24			31-Oct	12.59	12.7763
